# **Molecular basis for the maintenance of lipid asymmetry in the outer membrane of *Escherichia coli***

Jiang Yeow<sup>a,b,1</sup>, Kang Wei Tan<sup>a,1</sup>, Daniel A. Holdbrook<sup>c,1</sup>, Zhi-Soon Chong<sup>a</sup>, Jan K. Marzinek<sup>c,d</sup>, Peter J. Bond<sup>c,d,\*</sup>, Shu-Sin Chng<sup>a,e,\*</sup>

<sup>a</sup>Department of Chemistry, National University of Singapore, Singapore 117543, <sup>b</sup>National University of Singapore Graduate School for Integrative Sciences and Engineering (NGS), Singapore 117456, <sup>c</sup>Bioinformatics Institute, Agency for Science, Technology, and Research (A\*STAR), Singapore 138671, <sup>d</sup>Department of Biological Sciences, National University of Singapore, Singapore 117543, <sup>e</sup>Singapore Center for Environmental Life Sciences Engineering, National University of Singapore (SCELSE-NUS), Singapore 117456.

<sup>1</sup>These authors contributed equally to this work.

\*To whom correspondence should be addressed: Shu-Sin Chng, Department of Chemistry, National University of Singapore, Singapore 117543, E-mail: [chmchngs@nus.edu.sg](mailto:chmchngs@nus.edu.sg). Peter J. Bond, Bioinformatics Institute, Agency for Science, Technology, and Research (A\*STAR), Singapore 138671, Email: [peterjb@bii.a-star.edu.sg](mailto:peterjb@bii.a-star.edu.sg)

## Abstract

A distinctive feature of the Gram-negative bacterial cell envelope is the asymmetric outer membrane (OM), where lipopolysaccharides (LPS) and phospholipids (PLs) reside in the outer and inner leaflets, respectively. This unique lipid asymmetry renders the OM impermeable to external insults. In *Escherichia coli*, the OmpC-MlaA complex is believed to maintain lipid asymmetry by removing mislocalized PLs from the outer leaflet of the OM. How it performs this function is unknown. Here, we define the molecular architecture of the OmpC-MlaA complex to gain insights into its role in PL transport. We establish that MlaA sits entirely within the bilayer in complex with OmpC and provides a hydrophilic channel possibly for PL translocation across the OM. Furthermore, we show that flexibility in a hairpin loop adjacent to the channel modulates MlaA activity. Finally, we demonstrate that OmpC plays an active role in maintaining OM lipid asymmetry together with MlaA. Our work offers glimpses into how the OmpC-MlaA complex transports PLs across the OM and has important implications for future antimicrobial drug development.

# **Introduction**

The outer membrane (OM) of Gram-negative bacteria is an extremely asymmetric bilayer, comprising lipopolysaccharides (LPS) in the outer leaflet and phospholipids (PLs) in the inner leaflet (1, 2). LPS molecules pack tightly together in the presence of divalent cations to form an outer layer with markedly reduced fluidity and permeability (3). Thus, the OM serves as an effective barrier against toxic compounds including detergents and antibiotics. This function is fully dependent on the establishment and maintenance of lipid asymmetry; cells generally become more sensitive to external insults when OM lipid asymmetry is disrupted, which is typically characterized by the accumulation of PLs in the outer leaflet (4, 5). The OM is also essential for viability.

The requisite lipid asymmetry of the OM is likely initially established by direct placement of LPS and PLs into the outer and inner leaflets, respectively. LPS assembly into the outer leaflet of the OM is mediated by the well-established Lpt (lipopolysaccharide transport) machinery (6), but proteins that transport and insert PLs into the inner leaflet have not been identified. For entropic reasons, there is a natural tendency for PLs to appear in the outer leaflet of the OM, although how they traverse the bilayer is unclear. This occurs more readily with perturbations in the OM, especially when assembly of other OM components is disrupted (4, 5, 7). Since loss of lipid asymmetry compromises the barrier function of the OM, several mechanisms exist to remove PLs aberrantly localized in the outer leaflet of the membrane: (i) the OM phospholipase OmpLA hydrolyzes both acyl chains from outer leaflet PLs (8), (ii) the OM acyltransferase PagP transfers an acyl chain from outer leaflet PLs to LPS (9) or phosphatidylglycerol (PG) (10), and (iii) the OmpC-Mla system, a putative PL trafficking pathway, removes outer leaflet PLs and shuttles them back to the inner membrane (IM) (11, 12).

The OmpC-Mla system comprises seven proteins located across the cell envelope. Removing any component results in PL accumulation in the outer leaflet of the OM, and therefore sensitivity to SDS/EDTA (11, 12). The OM lipoprotein MlaA forms a complex with osmoporin OmpC that likely extracts PLs from the outer leaflet of the OM (12). The periplasmic protein MlaC serves as a lipid chaperone and is proposed to transport lipids from the OmpC-MlaA complex to the IM (11, 13, 14). At the IM, MlaF and MlaE constitute an ATP-binding cassette (ABC) family transporter together with two auxiliary proteins, MlaD and MlaB (14, 15); this complex presumably receives PLs from MlaC and inserts them into the membrane. MlaD has been shown to bind PLs, while MlaB is important for both assembly and activity of the transporter (15). Recently, the function of the OmpC-Mla system in retrograde (OM-to-IM) PL transport has been demonstrated in *E. coli* (7).

The molecular mechanism by which the OmpC-MlaA complex extracts PLs from the outer leaflet of the OM, presumably in an energy-independent manner, is an interesting problem. Aside from the LptDE machine, which assembles LPS on the surface (4, 5), the OmpC-MlaA complex is the only other system proposed to catalyze the translocation of lipids across the OM. OmpC is a classical trimeric porin that typically only allows passage of hydrophilic solutes across the OM (3, 16), while MlaA is believed to be anchored to the inner leaflet of the membrane; how the two proteins are organized in a complex for the translocation of amphipathic PLs is not known. In this paper, we establish that MlaA is in fact an integral membrane protein that forms a channel adjacent to OmpC trimers in the OM, likely allowing the passage of PLs. We first demonstrated that MlaA binds the OmpC trimer within the OM bilayer by mapping the interaction surfaces using in vivo crosslinking. Using a recently predicted structural model of MlaA (17), we obtained molecular views of the OmpC-MlaA complex by molecular dynamics

(MD) simulations, and experimentally established the existence of a hydrophilic channel within OM-embedded MlaA. Combining charge mutations in this channel modulated MlaA activity, suggesting functional importance. Furthermore, mutations altering the flexibility of a hairpin loop that could interact with the hydrophilic channel led to predictable in vivo effects on MlaA function. Finally, we identified a key residue on OmpC found at the OmpC-MlaA interacting surface that is important for proper function of the complex. Our findings provide important mechanistic insights into how PLs may be translocated across the OM to ensure proper lipid asymmetry.

## Results

### **The OmpC trimer contacts MlaA directly along its membrane-facing dimeric interfaces.**

To develop a detailed architectural understanding of the OmpC-MlaA complex, we carried out in vivo photocrosslinking to map intermolecular interactions within the complex. Guided by the crystal structure of the OmpC trimer (18), we introduced the UV-crosslinking amino acid, *para*-benzoyl-L-phenylalanine (*p*Bpa), at 49 positions in OmpC via amber suppression (19). Initial selection focused on residues that are either solvent-accessible (i.e. loop and lumen) or located near the membrane-water boundaries (i.e. aromatic girdle). Upon UV irradiation, a ~65 kDa crosslinked band that contains both OmpC (~37 kDa) and MlaA (~28 kDa) could be detected in cells expressing OmpC variants substituted with *p*Bpa at three positions (L50, Q83, or F267) (Fig. 1A). These residues are found on the periplasmic turns at the dimeric interfaces of the OmpC trimer (Fig. 1C), thus localizing possible binding sites for MlaA. We have previously proposed that OmpC may allow MlaA to traverse the bilayer and gain access to PLs that have accumulated in the outer leaflet of the OM (12). As none of the six selected residues in the OmpC lumen crosslinked to MlaA, we decided to probe for interactions

between MlaA and the membrane-facing side walls of OmpC, specifically around the dimeric interfaces of the OmpC trimer. Remarkably, out of the additional 49 positions tested in this region, 10 residues allowed photoactivated crosslinks between OmpC and MlaA when replaced with *p*Bpa (Fig. 1B and Fig. S1). In total, these 13 crosslinking residues clearly demarcate an extensive MlaA-interacting surface on OmpC (Fig. 1C). This explains why OmpC exhibits strong interactions and can be co-purified with MlaA on an affinity column, as we have previously reported (12). Two positions, Y149 and L340, are located right at or near the membrane-water boundary exposed to the extracellular environment, suggesting that MlaA traverses the entire width of the OM. We conclude that MlaA binds along the dimeric interfaces of the OmpC trimer in the membrane.

## **Two specific regions on MlaA contact the membrane-facing dimeric interfaces of the OmpC trimer.**

We sought to map in greater detail the OmpC-MlaA interacting surface in vitro. To do that, we first overexpressed and purified the OmpC-MlaA complex to homogeneity. We showed that this complex forms a single peak on size exclusion chromatography (SEC) (Fig. 2A). OmpC within this complex exhibits the characteristic heat-modifiable gel shift commonly observed for OM  $\beta$ -barrel proteins (20), consistent with the presence of the folded trimer. Multi-angle light scattering (MALS) analysis revealed that one copy of MlaA interacts with the OmpC trimer (Fig. S2), suggesting that only one of the three dimeric interfaces within the trimer is available for binding (Fig. 1C). We next performed protease digestion experiments to identify specific region(s) on MlaA that may interact stably with OmpC. OM  $\beta$ -barrel proteins such as OmpC are known to be protease-resistant (21). Given that some parts of MlaA contact OmpC within the membrane, we expect these bound regions to also be protected from proteolytic degradation.

Treatment of the purified OmpC-MlaA complex with trypsin results in almost complete degradation of MlaA, with the OmpC trimer remaining intact (Fig 2A). Following SEC, however, we found that an ~8 kDa peptide (presumably from MlaA) remains stably bound to the trimer. N-terminal sequencing and tandem mass spectrometry (MS) analyses revealed that this peptide corresponds to MlaA<sub>D61-K124</sub> (Figs. 2A and 2C, and Fig. S3). These results suggest that MlaA interacts strongly with OmpC in the membrane in part via this specific region.

To define how OmpC contacts the MlaA<sub>D61-K124</sub> peptide, we next attempted to overexpress and purify *pBpa*-containing OmpC variants in complex with MlaA, and determine which of the previously identified 13 OmpC residues interacts with MlaA<sub>D61-K124</sub> in vitro. We sequentially performed UV crosslinking and trypsin digestion to potentially link MlaA<sub>D61-K124</sub> to specific residues on OmpC. This approach may also allow trapping of other potential interacting regions of MlaA, which might not have been stably retained on the wild-type complex after trypsin digestion. We successfully detected trypsin-resistant crosslinked products for seven OmpC<sub>*pBpa*</sub>-MlaA complexes (Fig. 2B); these appeared slightly above OmpC between 37 to 50 kDa, indicating that peptides in the range of ~6-10 kDa are crosslinked to OmpC. N-terminal sequencing of six of the seven adducts showed the presence of OmpC, and an MlaA peptide beginning at residue D61 (Figs. 2C and 2D, and Fig. S3C). Given the approximate sizes of the crosslinked adducts, we concluded that all these residues interact with MlaA<sub>D61-K124</sub>. Interestingly, an additional peptide on MlaA starting at residue F133 was also found to crosslink at two (Y149 and L340) of these six positions on OmpC (Figs. 2B–D, and Fig. S3C). These adducts can be detected by an  $\alpha$ -MlaA antibody that recognizes an epitope within V182-Q195 on MlaA (Fig. 2B), suggesting that a peptide from F133 to at least R205 (next trypsin cleavage site)

may be crosslinked (Fig. 2C). Thus, in addition to MlaA<sub>D61-K124</sub>, our crosslinking strategy revealed a second point of contact (MlaA<sub>F133-R205</sub>) between OmpC and MlaA.

At the point of these findings, there was no available molecular structure for MlaA; however, a structural model has been predicted based on residue-residue contacts inferred from co-evolution analysis of metagenomic sequence data (17). Using a rigorously-validated quality score, this method of structure determination has generated reliable models for 614 protein families with currently unknown structures. We experimentally validated the model for MlaA by replacing residue pairs far apart on the primary sequence with cysteines, and showed that only those that are highly co-evolved (and predicted to be residue-residue contacts) allow disulfide bond formation in cells (Fig. S4). We therefore proceeded to use this MlaA model to understand the organization of the OmpC-MlaA complex. Interestingly, the positions of the two OmpC-contacting peptides on the MlaA model are spatially separated in a way consistent with the arrangement of the residues on OmpC that crosslink to each peptide (Fig. 2D). This not only reveals how MlaA may potentially be oriented and organized around the dimeric interface of the OmpC trimer, but also suggests that the entire MlaA molecule may reside in the membrane. In fact, the overall surface of MlaA, other than the putative periplasmic-facing region, is largely hydrophobic (Fig. S5). Furthermore, using all-atomistic MD simulations, we found that the structural fold of MlaA appears to be more stable in a lipid bilayer than in an aqueous environment (Fig. S6). Consistent with this, we note that even without its N-terminal lipid anchor, MlaA is not a soluble protein, and can only be extracted and purified from the OM in the presence of detergent. Collectively, these observations lend strong support to the validity of the predicted MlaA structure.



# **MlaA provides a hydrophilic channel that may allow PL translocation across the OM.**

To obtain a physical picture of how OmpC interacts with MlaA within the complex, we used MD simulations to dock MlaA onto the OmpC trimer within a PL bilayer. Using a previously reported protocol (22), we first docked the MlaA model onto the OmpC trimer structure, both as rigid bodies. Interestingly, all initial docked structures contained MlaA binding at one dimeric interface of OmpC. Based on information derived from crosslinking, we selected two most consistent models differing slightly in how MlaA is oriented with respect to OmpC for unrestrained refinements using all-atomistic simulations. Multiple simulations were run for each MlaA orientation in a PL bilayer until overall root-mean-square deviations (RMSD) stabilized; remarkably, the resulting equilibrium models fulfilled all observed experimental crosslinking data. We performed clustering on all available trajectories, and identified the most populated conformations of the OmpC-MlaA complex in our simulations (Fig. 3*A* and Fig. S7*A* for one MlaA orientation, and Fig. 3*B* and Fig. S7*B* for the other). These conformational models all show MlaA sitting in the bilayer, tucked nicely into the dimeric interface of the OmpC trimer. Evidently, the MlaA<sub>D61-K124</sub> peptide interacts extensively with OmpC in these models, consistent with why this peptide remains stably bound to OmpC after protease digestion (Fig. 2*A*). We also mutated several MlaA residues found at the OmpC-MlaA interfaces to *p*Bpa, and performed in vivo crosslinking experiments. We identified one position L109 that allowed strong photoactivatable crosslinking to OmpC when replaced with *p*Bpa (Fig. 3*C*). This residue lies within the MlaA<sub>D61-K124</sub> peptide (Figs. 3*A* and 3*B*), confirming that this region does in fact contact OmpC in cells.

One striking feature present in all the simulated OmpC-MlaA structures is a negatively-charged hydrophilic channel within MlaA that spans the lipid bilayer (Fig. 4*A*, and Fig. S8).

Based on its function in removing PLs from the outer leaflet of the OM, we hypothesize that this channel may allow passage of charged headgroups as PLs translocate across the membrane. To test the existence of this hydrophilic channel in MlaA in cells, we selected 27 residues in and around the putative channel in a representative model (Fig. 4, and Fig. S9), and determined their solvent accessibility using the substituted cysteine accessibility method (SCAM). We first showed that these cysteine mutants are functional (Fig. S9C). Solvent-exposed residues are expected to be reactive with the charged membrane-impermeable thiol-labelling reagent, sodium (2-sulfonatoethyl)methanethiosulfonate (MTSES). Remarkably, we found that residues predicted to be within the putative channel (Figs. 4A and 4B) or at the membrane-water boundaries (Figs. S9A and S9B) are indeed accessible to MTSES. We therefore conclude that MlaA forms a hydrophilic channel in the OM in cells.

To ascertain whether this channel is functionally important, we separately mutated 19 polar and (negatively) charged residues near or within the channel to alanine or arginine, and tested for MlaA function. However, all of these MlaA mutants are functional (Fig. 5B, and Fig. S10A), indicating that single residue changes are not sufficient to perturb channel properties to affect PL transport. We noticed that four (D160, D161, D164, and D167) of the five negatively-charged channel residues are in close proximity (Fig. 5A). To alter channel properties more drastically, we combined arginine mutations for these aspartates; interestingly, only the D161R/D167R double mutant (Fig. S10B) and D160R/D161R/D164R triple mutant (MlaA<sub>3D3R</sub>) disrupted function; cells expressing these variants are highly sensitive to SDS/EDTA (Fig. 5B, and Fig. S10B). For the MlaA<sub>3D3R</sub> mutant, this is likely due to the accumulation of PLs in the outer leaflet of the OM (as judged by PagP-mediated acylation of LPS; Fig. 5C). In fact, this mutant exhibits OM defects that are more pronounced than the  $\Delta mlaA$  strain (Fig. 5B),

suggesting gain of function. Consistent with this idea, the *3D3R* mutation gives rise to the same defects in strains also expressing the wild-type *mIaA* allele, revealing a dominant negative phenotype (Figs. 5B and 5C). We showed that MlaA<sub>3D3R</sub> is produced at levels comparable to wild-type MlaA on a plasmid (Fig. S11A), and is still able to interact strongly with OmpC (Fig. S11B). Taken together, these results suggest that the MlaA channel plays a functional role in maintenance of lipid asymmetry.

### **Flexibility of a hairpin loop adjacent to the channel on MlaA is required for function.**

The gain-of-function/dominant negative phenotype of the *mIaA*<sub>3D3R</sub> mutant is similar to a previously reported *mIaA*<sup>\*</sup> (or *mIaA*<sub>ΔNF</sub>) mutant (Figs. 5B and 5C) (23), suggesting that these mutations may have similar effects on MlaA structure and/or function. Interestingly, the positions of these mutations on the OmpC-MlaA models flank a hydrophobic hairpin loop (G141-L158) within MlaA (Fig. 6A). Therefore, we hypothesized that the loop could play a functional role in MlaA, and that these mutations may affect interactions with this loop. To examine this possibility, we created three separate mutations at the hairpin structure and tested each variant for MlaA function. Two of these mutations, Y<sup>147</sup>VQL→4A (*L1*) and F<sup>152</sup>YGSF→5A (*L2*), are designed to disrupt interactions with other regions of MlaA. The other mutation, P151A, removes a proline that may be critical for the hairpin turn structure. The N-terminus of the loop is connected to the rest of MlaA via an unstructured glycine-rich linker, which we reasoned may influence conformation of the entire hairpin structure. Thus, we constructed two additional mutants, G<sup>141</sup>VGYG→A<sup>141</sup>VAYA (*3G3A*) and G<sup>141</sup>VGYG→P<sup>141</sup>VPYP (*3G3P*), to reduce possible flexibility in this region. Remarkably, *L1*, *L2*, and *3G3P* mutations resulted in similar extents of SDS/EDTA sensitivity (Fig. 6B), as well

as OM outer leaflet PL accumulation (Fig. 6C), when compared to the  $\Delta mlaA$  mutation. Given that these mutations also do not affect MlaA levels or interaction with OmpC (Fig. S11), we conclude that they are loss-of-function mutations. The hairpin loop, along with its surrounding structures, forms an important functional region on MlaA.

Phenotypes observed for the loop rigidifying mutation (*3G3P*) and gain-of-function mutations (*3D3R* and *mlaA\**) suggest that flexibility in the hairpin loop is critical for MlaA function. We hypothesize that the hairpin loop may exist in two distinct conformations. The *3D3R* or *mlaA\** mutations could alter interactions with the loop, resulting in it adopting one conformation, and somehow giving rise to gain-of-function/dominant negative phenotypes; in the case of *mlaA\**, it was proposed that this mutation caused MlaA to be in a “leaky” or “open” state, and allowed PLs to flip out to the outer leaflet of the OM (23). In contrast, the *3G3P* mutation may lock the hairpin loop in a second conformation, where MlaA is in a “closed” state, thus abolishing function in PL transport. If these were true, we predict that rigidification of the hairpin loop with the *3G3P* mutation would be able to correct gain-of-function/dominant negative phenotypes observed in the *3D3R* and/or *mlaA\** mutants. Indeed, the *3G3P/3D3R* and *3G3P/mlaA\** combination mutants no longer exhibit gain-of-function/dominant negative phenotypes, but behave like the *3G3P* or null mutants (Fig. 6D). Again, these variants are expressed at comparable levels to the single mutants, and still interact with OmpC (Fig. S11). Taken together, these results indicate clear importance of dynamics in the hairpin loop in controlling the function of MlaA.

**A specific residue in the dimeric interface of OmpC is important for its function in maintaining lipid asymmetry.**

Given that MlaA sits in the membrane and provides a channel that putatively allows movement of PLs across the OM, it is not clear why it should bind at one of the dimeric interfaces of OmpC trimers, and what the exact role of OmpC may be. To understand the importance of OmpC-MlaA interaction, we attempted to engineer monomeric OmpC constructs that we predict would no longer interact with MlaA. We installed specific mutations (G19W and/or R92L) in OmpC that were found previously to disrupt the oligomerization state of its homolog OmpF (G19W and R100L correspondingly) in vitro (24) (Fig. 7A). Both the OmpC<sub>G19W</sub> and OmpC<sub>R92L</sub> single mutants can interact with MlaA, and still form trimers in vitro, albeit slightly destabilized compared to wild-type OmpC (Fig. S12). Combination of these mutations further weakens the OmpC trimer, with noticeable monomer population at physiological temperature. Intriguingly, both the double mutant and the R92L single mutant accumulated PLs in the outer leaflet of the OM (Fig. 7B), indicating that R92 is important for the role of OmpC in OM lipid asymmetry. Consistent with this idea, we demonstrated that cells expressing the OmpC<sub>R92A</sub> variant also exhibit perturbations in OM lipid asymmetry. We further showed that all these *ompC* alleles can rescue severe SDS/EDTA sensitivity known for cells lacking OmpC (Fig. 7C), suggesting normal porin function; however, cells expressing OmpC<sub>G19W/R92L</sub> and OmpC<sub>R92A</sub>, unlike WT and OmpC<sub>R92L</sub>, are still sensitive to SDS at higher concentrations of EDTA. These phenotypes mirror those observed for cells lacking MlaA, suggesting the loss of Mla function in these mutant strains. It appears that the R92 residue is critical for this function, although it is not clear why the single R92L mutation did not result in SDS/EDTA sensitivity. The exact role of R92 is not known, but the phenotypes observed for the single R92A mutation cannot be due to disruption of OmpC trimerization (Fig. S12). We conclude that OmpC has an active role in maintaining OM lipid symmetry together with MlaA.

## Discussion

Osmoporin OmpC interacts with MlaA to maintain lipid asymmetry in the OM; how this complex is organized to extract PLs from the outer leaflet of the OM is not known. In this study, we have employed photoactivatable crosslinking and MD simulations to gain insights into the molecular architecture of the OmpC-MlaA complex. We have established that MlaA interacts extensively with OmpC at one of the dimeric interfaces of the porin trimer, and resides entirely within the OM lipid bilayer. We have also demonstrated that MlaA forms a hydrophilic channel, likely allowing PLs to translocate across the OM. This overall organization of the OmpC-MlaA complex is quite remarkable, especially how MlaA spans the OM and possibly gains access to outer leaflet PLs. Very few lipoproteins are known to span the OM; some notable examples include the LptDE and Wza translocons, which transports LPS and capsular polysaccharides, respectively. In the LptDE complex, the OM lipoprotein LptE serves as a plug, and stretches across the bilayer through the lumen of the LptD  $\beta$ -barrel (25, 26). In the octameric Wza translocon, each protomer provides a C-terminal  $\alpha$ -helix to form a pore that spans the membrane (27). MlaA is unique in that it is essentially an integral membrane protein, capable of forming a channel on its own. In many ways, MlaA behaves like typical OM  $\beta$ -barrel proteins, even though it is predominantly  $\alpha$ -helical. Furthermore, being overall a hydrophobic protein also poses a problem for MlaA to transit across the periplasmic space. How MlaA is shielded from the aqueous environment, in addition to the requirement of the Lol system (28), necessitates further investigation.

Very recently, crystal structures of MlaA in complex with trimeric porins have in fact been solved (29). Interestingly, the experimentally-determined structures of MlaA closely

resembled the initial MlaA model predicted from co-evolution analysis (Fig. S13A). These structures revealed that MlaA interacts with trimeric porins at one or more of their dimeric interfaces (Fig. S13B), in an orientation similar to one of our simulated OmpC-MlaA models (Fig. 3B). They also showed that MlaA contains a channel. Clearly, these findings converged with the main conclusions derived from our biochemical and modelling studies, which is quite remarkable. We note, however, a couple of discrepancies between the solved structures and our biochemical data, suggesting that these static structures may represent only one of several possible stable conformations of MlaA, which may exist as part of the mechanism associated with lipid transport in the native OM environment. First, the distance separating porin residues equivalent to Y149/L340 in OmpC and the MlaA<sub>F133-R205</sub> peptide (Fig. S13B) is not consistent with the detection of strong photoactivatable crosslinks between these regions in the complex (Fig. 2B). Second, the proposed location of some MlaA residues, specifically M39, F42, and N43, at the interior of the lipid bilayer (Fig. S13B) is not in agreement with high or partial solvent accessibility of these sites in cells, as highlighted in the SCAM data (Fig. S9B). Upon close examination of the structures, we found multiple non-native MlaA-MlaA and MlaA-porin contacts in all the crystal forms (Fig. S13C); these artificial crystal contacts, some with substantial buried surface areas, may have influenced the observed conformation of MlaA. Given that the MlaA-porin structures were also not solved in the context of a native lipid bilayer, we suspect that they do not yet provide the complete picture.

Our functional data on the OmpC-MlaA complex provide a glimpse of how PLs may translocate across the OM during maintenance of lipid asymmetry. One key aspect of MlaA function resides in a hairpin loop structure juxtaposed against the hydrophilic channel. Dynamics of this loop appear to control whether MlaA exists in a “closed” or “open” state, and thus access

of PLs through the channel. A mutation that likely rigidifies the loop locks MlaA in the non-functional “closed” state (Fig. 6), while mutations that possibly affect interactions with the loop favors the “open” state, and gives rise to gain of function (Fig. 5). Therefore, the hairpin loop may directly gate the channel, providing access for outer leaflet PLs across the OM. This idea has also been suggested based on the solved MlaA structures, where a putative disulfide bond that apparently locks the loop in position renders MlaA non-functional (29).

How OmpC participates in maintaining OM lipid asymmetry as part of the complex is not clear, especially given that MlaA alone provides a channel for PL translocation. It is possible that OmpC may play a passive role, and simply be important for stabilizing the structure and orientation of MlaA in the OM. However, we have previously shown that MlaA also interacts with OmpF, yet removing OmpF has minimal effects on OM lipid asymmetry (12); this argues against a mere passive role for OmpC in PL translocation. Furthermore, we have now identified a specific residue R92 on OmpC that is required for maintaining OM lipid asymmetry (Fig. 7). Therefore, we believe that OmpC plays an active role in the process. R92 lies in the dimeric interface of the OmpC trimer, which incidentally is where MlaA binds. Even though this residue has been shown to be important for gating the porin (30), it is not obvious how this gating function may influence the translocation of PLs by MlaA. Instead, we speculate that being close to Y149 and L340, R92 may somehow affect interactions between OmpC and the MlaA<sub>F133-R205</sub> peptide, possibly influencing MlaA conformation in the OM, and in turn, properties of the hydrophilic channel. The role that R92 plays in OmpC-MlaA function should be further characterized.

The OmpC-MlaA complex is proposed to extract PLs from the outer leaflet of the OM and hand them over to MlaC, which resides in the periplasm. Consistent with this idea, *E. coli*



MlaC has been crystallized with a bound PL, and shown to interact with a complex of OmpF-MlaA in vitro (14). However, it is not clear how transfer of PLs from OmpC-MlaA to MlaC takes place, even though this must presumably occur in an energy-independent fashion. Since PL movement from the outer to inner leaflets of the OM is entropically disfavored, it is likely that translocation of PLs by the OmpC-MlaA complex would be coupled to transfer to MlaC, i.e. extracted PLs do not go into the inner leaflet. If this were true, it may be possible that MlaC also influences the function of the OmpC-MlaA complex. Specifically, binding of MlaC to the complex may be required for PL extraction from the outer leaflet of the OM. MlaC could alter the structure and/or dynamics of MlaA in the OmpC-MlaA complex, ultimately leading to efficient PL translocation across the OM.

Lipid asymmetry is critical for the OM to function as an effective permeability barrier. Thus, understanding mechanistic aspects of how bacterial cells maintain OM lipid asymmetry would guide us in designing strategies to overcome the barrier. Our work on elucidating the architecture and function of the OmpC-MlaA complex has revealed critical insights into the role of a hairpin loop on MlaA in modulating activity, a feature that can be exploited in drug discovery efforts. In particular, small molecules that can potentially influence dynamics of this loop may induce either loss or gain of function, thereby leading to increased sensitivity to existing antibiotics.

## Experimental procedures

**Bacterial strains and plasmids.** All strains and plasmids used are listed in Table S1 and S2, respectively.

**Growth conditions.** Luria Bertani (LB) broth and agar were prepared as described previously (12). Unless otherwise noted, ampicillin (Amp) (Sigma-Aldrich, MO, USA) was used at a concentration of 200 µg/mL, chloramphenicol (Cam) (Alfa Aesar, Heysham, UK) at 15 µg/mL, kanamycin (Kan) (Sigma-Aldrich) at 25 µg/mL, and spectinomycin (Spec) (Sigma-Aldrich) at 50 µg/mL. For crosslinking experiments, *para*-Benzoyl-L-phenylalanine (*p*Bpa; Alfa Aesar) was dissolved in 1 M NaOH at 0.25 M, and used at 0.25 mM unless otherwise mentioned.

**Plasmid construction.** To construct most plasmids, the desired gene or DNA fragments were amplified by PCR from the DNA template using primers listed in Table S3. Amplified fragments were digested with relevant restriction enzymes (New England Biolabs) and ligated into the same sites of an appropriate plasmids using T4 DNA ligase (New England Biolabs). NovaBlue competent cells were transformed with the ligation products and selected on LB plates containing appropriate antibiotics. All constructs were verified by DNA sequencing (Axil Scientific, Singapore).

**Construction of chromosomal *ompC* mutants using negative selection.** All chromosomal *ompC* mutations were introduced via a positive-negative selection method described previously (31). To prepare electro-competent cells, strain MC4100 harbouring pKM208 (32) grown

overnight at 30 °C was inoculated into 15 mL SOB broth with 1:100 dilution. Cells were grown at the same temperature until OD<sub>600</sub> reached ~0.3-0.4. 1 mM of IPTG was added and the culture was grown for another 60 min at 30 °C. Cells were then subjected to heat shock at 42 °C for 15 min, followed by incubation for 15 min on ice, with intermittent agitation. Subsequently, cells were centrifuged at 5000 x g for 10 min and made competent by washing twice with prechilled sterile water followed by cold 10 % glycerol. Competent cells were pelleted and resuspended in cold 10 % glycerol. For positive selection, 1 µg *kan-PrhaB-tse2* cassette amplified from pSLC-246 (31) using ompC\_NS\_N5 and ompC\_NS\_C3 primer pairs was transformed into the competent cells using 1-mm electroporation cuvettes (Biorad) in Eppendorf Eporator<sup>®</sup> (Eppendorf) with an output voltage of 1800 V. Cells were recovered in LB with 2 % glucose at 37 °C for at least 4 h, plated onto LB plates supplemented with Kan and 2 % glucose, and incubated at 37 °C for 24 h. For negative selection, 1 µg PCR product of *ompC* wild-type or mutant constructs amplified using ompC\_NS\_N5\_C and ompC\_NS\_C3\_C primer pairs were transformed into competent cells made from positive selection using similar procedures. After transformation, cells were plated onto minimal (M9) plates supplemented with 0.2 % rhamnose, and incubated for 48 h at 37 °C. Surviving colonies were PCR screened and verified by DNA sequencing (Axil Scientific, Singapore).

**In vivo photoactivatable crosslinking.** We adopted previously described protocol (19) for all in vivo photoactivatable crosslinking experiments. Briefly, amber stop codon (TAG) was introduced at selected positions in either pDSW206*ompC* or pCDF*m1aA-His* plasmids via site directed mutagenesis using primers listed in Table S3. For *OmpC* crosslinking, MC4100 with  $\Delta ompC::kan$  background harbouring p*Sup-BpaRS-6TRN* (33) and pDSW206*ompC* were used.

For MlaA crosslinking, MC4100 with  $\Delta mlaA::kan$  background harbouring *pSup-BpaRS-6TRN* (33) and *pCDFmlaA-His* were used. An overnight 5 mL culture was grown from a single colony in LB broth supplemented with appropriate antibiotics at 37 °C. Overnight cultures were diluted 1:100 into 10 mL of the same media containing 0.25 mM *pBpa* and grown until OD<sub>600</sub> reached ~1.0. Cells were normalized by optical density before pelleting and resuspended in 1 mL ice cold TBS (20 mM Tris pH 8.0, 150 mM NaCl). Samples were either used directly or irradiated with UV light at 365 nm for 20 min at 4 °C or room temperature. All samples were pelleted again and finally resuspended in 200 µL of 2 X Laemmli buffer, boiled for 10 min, and centrifuged at 21,000 x *g* in a microcentrifuge for one min at room temperature; 15 µL of each sample subjected to SDS-PAGE and immunoblot analyses.

**Over-expression and purification of OmpC-MlaA-His complexes.** All proteins were overexpressed in and purified from BL21(λDE3) derivatives. We found that BL21(λDE3) strains from multiple labs do not actually produce OmpC (gene is somehow missing in these strains); therefore, to obtain OmpC-MlaA complexes, we deleted *ompF* from the chromosome and introduced *ompC* on a plasmid. OmpC-MlaA-His protein complexes were over-expressed and purified from BL21(λDE3) cells with chromosomal  $\Delta ompF::kan$  background co-transformed with either *pDSW206ompC<sub>pBpa</sub>*, *pSup-BpaRS-6TRN* and *pCDFdmlaA-His* (for in vitro crosslinking experiments), or *pACYC184ompC* and *pET22b(+)**dmlaA-His* (for characterization of the wildtype complex). An overnight 10 mL culture was grown from a single colony in LB broth supplemented with appropriate antibiotics at 37 °C. The cell culture was then used to inoculate a 1-L culture and grown at the same temperature until OD<sub>600</sub> reached ~ 0.6. For induction, 0.5 mM IPTG (Axil Scientific, Singapore) was added and the culture was grown for

another 3 h at 37 °C. Cells were pelleted by centrifugation at 4,700 x g for 20 min and then resuspended in 10-mL TBS containing 1 mM PMSF (Calbiochem) and 30 mM imidazole (Sigma-Aldrich). Cells were lysed with three rounds of sonication on ice (38 % power, 1 second pulse on, 1 second pulse off for 3 min). Cell lysates were incubated overnight with 1 % n-dodecyl  $\beta$ -D-maltoside (DDM, Calbiochem) at 4 °C. Cell debris was removed by centrifugation at 24,000 x g for 30 min at 4 °C. Subsequently, supernatant was incubated with 1 mL Ni-NTA nickel resin (QIAGEN), pre-equilibrated with 20 mL of wash buffer (TBS containing 0.025 % DDM and 80 mM imidazole) in a column for 1 h at 4 °C with rocking. The mixture was allowed to drain by gravity before washing vigorously with 10 x 10 mL of wash buffer and eluted with 10 mL of elution buffer (TBS containing 0.025% DDM and 500 mM imidazole). The eluate was concentrated in an Amicon Ultra 100 kDa cut-off ultra-filtration device (Merck Millipore) by centrifugation at 4,000 x g to ~500  $\mu$ L. Proteins were further purified by SEC system (AKTA Pure, GE Healthcare, UK) at 4 °C on a prepacked Superdex 200 increase 10/300 GL column, using TBS containing 0.025% DDM as the eluent. Protein samples were used either directly or irradiated with UV at 365 nm for in vivo photoactivable crosslinking experiments.

#### **SEC-MALS analysis to determine absolute molar masses of OmpC-MlaA-His complex.**

Prior to each SEC-MALS analysis, a preparative SEC was performed for BSA (Sigma-Aldrich) to separate monodisperse monomeric peak and to use as a quality control for the MALS detectors. In each experiment, monomeric BSA was injected before the protein of interest and the settings (calibration constant for TREOS detector, Wyatt Technology) that gave the well-characterized molar mass of BSA (66.4 kDa) were used for the molar mass calculation of the protein of interest. SEC purified OmpC-MlaA-His was concentrated to 5 mg/mL and injected

into Superdex 200 Increase 10/300 GL column pre-equilibrated with TBS and 0.025 % DDM. Light scattering (LS) and refractive index ( $n$ ) data were collected online using miniDAWN TREOS (Wyatt Technology, CA, USA) and Optilab T-rEX (Wyatt Technology, CA, USA), respectively, and analyzed by ASTRA 6.1.5.22 software (Wyatt Technology). Protein-conjugate analysis available in ASTRA software was applied to calculate non-proteinaceous part of the complex. In this analysis, the refractive index increment  $dn/dc$  values (where  $c$  is sample concentration) of 0.143 mL/g and 0.185 mL/g were used for DDM and protein complex, respectively (34). For BSA, UV extinction coefficient of 0.66 mL/(mg.cm) was used. For the OmpC-MlaA-His complex, that was calculated to be 1.66 mL/(mg.cm), based on its predicted stoichiometric ratio OmpC<sub>3</sub>MlaA.

**Affinity purification experiments.** Affinity purification experiments were conducted using  $\Delta mlaA$  strains expressing MlaA-His at low levels from the pET23/42 vector. For each strain, a 1.5-L culture (inoculated from an overnight culture at 1:100 dilution) was grown in LB broth at 37 °C until OD<sub>600</sub> of ~0.6. Cells were pelleted by centrifugation at 4700 x  $g$  for 20 min and then resuspended in 10-mL TBS containing 1 mM PMSF (Calbiochem) and 50 mM imidazole (Sigma-Aldrich). Cells were lysed with three rounds of sonication on ice (38 % power, 1 second pulse on, 1 second pulse off for 3 min). Cell lysates were incubated overnight with 1 % n-dodecyl  $\beta$ -D-maltoside (DDM, Calbiochem) at 4 °C. Cell debris was removed by centrifugation at 24,000 x  $g$  for 30 min at 4 °C. Subsequently, supernatant was incubated with 1 mL Ni-NTA nickel resin (QIAGEN), pre-equilibrated with 20 mL of wash buffer (TBS containing 0.025% DDM and 80 mM imidazole) in a column for 1 h at 4 °C with rocking. The mixture was allowed to drain by gravity before washing vigorously with 10 x 10 mL of wash buffer and eluted with 5

mL of elution buffer (TBS containing 0.025% DDM and 500 mM imidazole). The eluate was concentrated in an Amicon Ultra 100 kDa cut-off ultra-filtration device (Merck Millipore) by centrifugation at 4,000 x g to ~100  $\mu$ L. The concentrated sample was mixed with equal amounts of 2X Laemmli buffer, boiled at 100 °C for 10 min, and subjected to SDS-PAGE and immunoblot analyses.

**Trypsin digestion for protein N-terminal sequencing and mass spectrometry analyses.** A 1 mg/mL solution of purified OmpC-MlaA-His (OmpC was either wild-type or substituted with *p*Bpa at selected positions) complex was incubated with or without 50  $\mu$ g/mL trypsin (Sigma-Aldrich) for 1 h at room temperature. *p*Bpa substituted samples were irradiated with UV at 365 nm before trypsin digestion. Samples were then analyzed by SDS-PAGE, followed by SEC. Peak fractions from SEC for each sample were pooled, concentrated using an Amicon Ultra 100 kDa cut-off ultra-filtration device (Merck Millipore), and resuspended in 2 X Laemmli sample buffer before analyses by SDS-PAGE and immunoblot using  $\alpha$ -MlaA antibody. For N-terminal sequencing, samples were transferred onto PVDF membrane, followed by Coomassie Blue staining (1–2 s). The desired protein bands were carefully excised with a surgical scalpel. For tandem MS, protein bands were excised from a Coomassie Blue stained Tricine gel. Samples prepared for N-terminal sequencing and tandem MS were kept in sterile 1.5 mL centrifuge tubes before submission for analyses at Tufts University Core Facility, Boston, USA, and Taplin Biological Mass Spectrometry Facility, Harvard Medical School, Boston, USA, respectively.

**Substituted cysteine accessibility method (SCAM).** 1-mL cells were grown to exponential phase ( $OD_{600}$  ~0.6), washed twice with TBS (pH 8.0), and resuspended in 480  $\mu$ L of TBS. For

the blocking step, four tubes containing 120  $\mu$ L of cell suspension were either untreated (positive and negative control tubes added with deionized H<sub>2</sub>O) or treated with 5 mM thiol-reactive reagent *N*-ethylmaleimide (NEM, Thermo Scientific) or sodium (2-sulfonatoethyl) methanethiosulfonate (MTSES, Biotium). As MTSES is membrane impermeable, it is expected to react with the free cysteine in MlaA variants only when the residue near or at the membrane-water boundaries, or in a hydrophilic channel. In contrast, NEM is expected to label all MlaA cysteine variants as it is membrane permeable. Reaction with MTSES or NEM blocks the particular cysteine site from subsequently labelling by maleimide-polyethylene glycol (Mal-PEG; 5 kDa, Sigma-Aldrich). After agitation at room temperature for 1 h, cells were washed twice with TBS, pelleted at 16,000  $\times$  g, and resuspended in 100  $\mu$ L of lysis buffer (10 M urea, 1% SDS, 2 mM EDTA in 1 M Tris pH 6.8). Both NEM- and MTSES-blocked samples and the positive control sample were exposed to 1.2 mM Mal-PEG-5k. After agitation for another hour with protection from light, all samples were added with 120  $\mu$ L of 2 X Laemmli buffer, boiled for 10 min, and centrifuged at 21,000  $\times$  g in a microcentrifuge for one min at room temperature; 20  $\mu$ L from each sample tubes were subjected to SDS-PAGE and immunoblot analyses.

**In vivo disulfide bond analysis.** Strain NR1216 ( $\Delta dsbA$ ) harbouring pET23/42*mLaA-His* expressing MlaA-His with site specific cysteine substitutions was grown overnight in LB broth at 37 °C. A 0.5 mL of overnight culture was normalized by optical density, added with trichloroacetic acid (TCA) at final concentration of ~14 % and mixed thoroughly at 4 °C. This step was performed to prevent scrambling of disulfide bond formed in the cysteines substituted MlaA-His. Proteins precipitated for at least 30 min on ice were centrifuged at 16,000  $\times$  g for 10 min at 4 °C. The pellet was washed with 1 mL of ice-cold acetone and centrifuged again at



16,000 × *g* for 10 min at 4 °C. Supernatants were then aspirated and the pellet was air dried at room temperature for at least 20 min. Samples were resuspended thoroughly with 100 µL of either 100 mM Tris.HCl pH 8.0, 1% SDS (for non-reduced samples), or the same buffer supplemented with 100 mM of dithiothreitol (DTT) (for reduced samples), incubated for 20 min at room temperature. The samples were finally mixed with 4 X Laemmli buffer, boiled for 10 min and subjected to SDS-PAGE and immunoblotting analyses using α-His antibody.

**Docking of MlaA to OmpC.** The ClusPro server (22) was used to dock MlaA (ligand, uniprot ID: P76506, [https://gremlin2.bakerlab.org/meta\\_struct.php?page=p76506](https://gremlin2.bakerlab.org/meta_struct.php?page=p76506)) (17) to OmpC (receptor, PDB ID: 2J1N) (18). The default server settings were used in the docking procedure. The minimum distance between 6 residues on OmpC and the corresponding cross-linked peptide regions of MlaA was calculated for all the predicted structures obtained from the server. Two OmpC-MlaA model with the smallest average minimum distance of all residue and peptide pairs were selected as the initial structures for use in the all-atom simulations.

**Simulation procedures and setup.** All simulations were performed using version 5.1.4 of the GROMACS simulation package (35, 36).

*All-atom simulations.* In total, 7 all-atom simulations were performed (Table A). The simulations were performed using the CHARMM36 force field parameter set (37). The equations of motion were integrated using the Verlet leapfrog algorithm with a step size of 2 fs. Lengths of hydrogen bonds were constrained with the LINCS algorithm (38). Electrostatic interactions were treated using the smooth Particle Mesh Ewald (PME) method (39), with cutoff for short-range interactions of 1.2 nm. The van der Waals interactions were switched smoothly to zero between

1.0 and 1.2 nm. The neighbor list was updated every 20 steps. The Nose-Hoover thermostat (40, 41) with a coupling constant of 1.0 ps was used to maintain a constant system temperature of 313 K. The protein, membrane and solvent (water and ions) were coupled to separate thermostats. The Parrinello-Rahman barostat (42) with a coupling constant of 5.0 ps was used to maintain a pressure of 1 bar. Semi-isotropic pressure coupling was used for all the membrane systems, while isotropic coupling was used for the solvent-only system. Initial velocities were set according to the Maxwell distribution.

Proteins were inserted into a pre-equilibrated, symmetrical 1,2-dimyristoyl-phosphatidylethanolamine (DMPE) membrane over 5 ns using the membed tool (43) in the GROMACS simulation package. Subsequent equilibration, with position restraints of 1000 kJ mol<sup>-1</sup> placed on all non-hydrogen protein atoms, was performed for 20 ns to allow the solvent and lipids to equilibrate around the proteins. The position restraints were removed before performing the production runs.

Table A. Summary of all-atom molecular simulations: system compositions and simulation times

| Protein Configuration                                | Lipids   | Water and Ions                                                    | Simulation time (# of simulations x ns) |
|------------------------------------------------------|----------|-------------------------------------------------------------------|-----------------------------------------|
| MlaA                                                 | N/A      | 9439 H <sub>2</sub> O<br>29 K <sup>+</sup><br>19 Cl <sup>-</sup>  | 1 x 500                                 |
| MlaA                                                 | 272 DMPE | 11734 H <sub>2</sub> O<br>42 K <sup>+</sup><br>32 Cl <sup>-</sup> | 1 x 500                                 |
| OmpC trimer<br>MlaA (ClusPro model) in orientation 1 | 980 DMPE | 36113 H <sub>2</sub> O<br>98 K <sup>+</sup><br>98 Cl <sup>-</sup> | 1 x 500<br>1 x 320<br>1 x 130           |
| OmpC trimer<br>MlaA (ClusPro model) in orientation 2 | 980 DMPE | 36113 H <sub>2</sub> O<br>98 K <sup>+</sup><br>98 Cl <sup>-</sup> | 1 x 500<br>1 x 500                      |

All of the simulations performed are summarized in Table A. For the OmpC trimer docked with MlaA in orientation 1, three separate production simulations with different initial velocities were performed for the OmpC-MlaA complex, resulting in 3 trajectories of 500 ns, 320 ns, and 130 ns in length, respectively. For the OmpC trimer docked with MlaA in orientation 2, two separate production simulations with different initial velocities were performed for the complex, resulting in 2 trajectories of 500 ns in length. Clustering was performed on the MlaA structures obtained from a combined trajectory of all three (MlaA orientation 1) or two (MlaA orientation 2) atomistic simulations – a total of 4750 frames spaced every 0.2 ns. The structures were assigned to clusters using Root Mean Squared Distance (RMSD) with a 0.1 nm cut-off. Four and two clusters, respectively, were observed for MlaA in the two orientations to contain greater than 100 frames. The central structure of these four clusters was used to generate the representative OmpC-MlaA models (Fig. S7). trj\_cavity was used to identify the location the pore cavity (44), and Hole was used to create the pore profile (45).

**Temperature titration for chromosomal *ompC* mutants.** Purified wild-type and mutant OmpC-MlaA-His complexes were aliquoted into 1.5 mL centrifuge tubes and incubated in water bath set at different temperatures for 10 min. 20 µl of each sample were transferred into separate tubes and mixed immediately with equal volume of 2 X Laemmli buffer and subjected to SDS-PAGE in 12 % Tris.HCl gels, followed by Coomassie Blue staining (Sigma-Aldrich).

**LPS labeling and lipid A isolation.** Mild acid hydrolysis of [<sup>32</sup>P]-labeled cultures was used to isolate lipid A according to a procedure described previously (4, 12, 52) with some modifications. 5 mL cultures were grown (inoculated with overnight cultures at 1:100 dilution)

in LB broth at 37 °C until OD<sub>600</sub> reached ~0.5–0.7 (exponential) or ~2–4 (stationary). Cultures were uniformly labeled with 1 µCi mL<sup>-1</sup> [<sup>32</sup>P]-disodium phosphate (Perkin-Elmer) from the start of inoculation. One MC4100 wild-type culture labeled with [<sup>32</sup>P] was treated with 25 mM EDTA, pH 8.0 for 10 min prior to harvesting. Cells (5 mL and 1 mL for exponential and stationary phase cultures respectively) were harvested by centrifugation at 4700 × g for 10 min and washed twice with 1 mL PBS (137 mM NaCl, 2.7 mM KCl, 10 mM Na<sub>2</sub>HPO<sub>4</sub>, 1.8 mM KH<sub>2</sub>PO<sub>4</sub>, pH 7.4) at 5000 × g for 10 min. Each cell pellet was resuspended in 0.32 mL PBS, and converted into single phase Bligh/Dyer mixture (chloroform/methanol/water:1/2/0.8) by adding 0.8 mL methanol and 0.4 mL chloroform. The single phase Bligh/Dyer mixture was incubated at room temperature for 20 min, followed by centrifugation at 21,000 × g for 30 min. Each pellet obtained was washed once with 1 mL freshly made single phase Bligh/Dyer mixture and centrifuged as above. The pellet was later resuspended in 0.45 mL 12.5 mM sodium acetate containing 1 % SDS, pH 4.5. The mixture was sonicated for 15 min before incubation at 100 °C for 40 min. The mixture was converted to a two-phase Bligh/Dyer mixture (chloroform/methanol/water: 2/2/1.8) by adding 0.50 mL methanol and 0.50 mL chloroform. The lower phase of each mixture was collected after phase partitioning by centrifugation at 21 000 × g for 30 min. The collected lower phase was washed once with 1 mL of the upper phase derived from the freshly made two-phase Bligh/Dyer mixture and centrifuged as above. The final lower phase was collected after phase partitioning by centrifugation and dried under N<sub>2</sub> gas. The dried radiolabeled lipid A samples were redissolved in 100 µL of chloroform/methanol mixture (4/1), and 20 µL of the samples were used for scintillation counting (MicroBeta2®, Perkin-Elmer). Equal amounts of radiolabeled lipids (cpm/lane) were spotted onto the TLC plate (Silica Gel 60 F254, Merck Millipore) and were separated using the solvent system consisting of

chloroform/pyridine/96 % formic acid/water (50/50/14.6/4.6) (5). The TLC plate was then dried and exposed to phosphor storage screens (GE Healthcare). Phosphor-screens were visualized in a phosphor-imager (Storm 860, GE Healthcare), and the spots were analyzed by ImageQuant TL analysis software (version 7.0, GE Healthcare). Spots were quantified and averaged based on three independent experiments of lipid A isolation.

**OM permeability studies.** OM sensitivity against SDS/EDTA was judged by colony-forming-unit (CFU) analyses on LB agar plates containing indicated concentrations of SDS/EDTA. Briefly, 5 mL cultures were grown (inoculated with overnight cultures at 1:100 dilution) in LB broth at 37 °C until OD<sub>600</sub> reached ~0.4-0.6. Cells were normalized by optical density, first diluted to OD<sub>600</sub> = 0.1 (~10<sup>8</sup> cells), and then serially diluted (ten-fold) in LB broth using 96-well microtiter plates. 2.5 µL of the diluted cultures were manually spotted onto the plates, dried, and incubated overnight at 37 °C. Plate images were visualized by G:Box Chemi-XT4 (Genesys version 1.4.3.0, Syngene).

**SDS-PAGE, immunoblotting and staining.** All samples subjected to SDS-PAGE were mixed 1:1 with 2X Laemmli buffer. Except for temperature titration experiments, the samples were subsequently either kept at room temperature or subjected to boiling at 100 °C for 10 min. Equal volumes of the samples were loaded onto the gels. As indicated in the figure legends, SDS-PAGE was performed using either 12% or 15% Tris.HCl gels (53) or 15% Tricine gel (54) at 200 V for 50 min. After SDS-PAGE, gels were visualized by either Coomassie Blue staining, or subjected to immunoblot analysis. Immunoblot analysis was performed by transferring protein bands from the gels onto polyvinylidene fluoride (PVDF) membranes (Immun-Blot 0.2 µm, Bio-

645 Rad, CA, USA) using semi-dry electroblotting system (Trans-Blot Turbo Transfer System, Bio-  
646 Rad). Membranes were blocked for 1 h at room temperature by 1 X casein blocking buffer  
647 (Sigma-Aldrich), washed and incubated with either primary antibodies (monoclonal  $\alpha$ -MlaA (12)  
648 (1:3000) and  $\alpha$ -OmpC (31) (1:1500)) or monoclonal  $\alpha$ -His antibody (pentahistidine) conjugated  
649 to the horseradish peroxidase (HRP) (Qiagen, Hilden, Germany) at 1:5000 dilution for 1 – 3 h at  
650 room temperature. Secondary antibody ECL™ anti-mouse IgG-HRP was used at 1:5000  
651 dilution. Luminata Forte Western HRP Substrate (Merck Millipore) was used to develop the  
652 membranes, and chemiluminescence signals were visualized by G:Box Chemi-Xt4 (Genesys  
653 version 1.4.3.0, Syngene).

654

**Acknowledgements.** We thank Swaine Chen and Varnica Khetrpal (Genome Institute of Singapore, A\*STAR) for providing  $\alpha$ -OmpC antibody, and reagents for negative selection and assistance in this technique. We also thank Michael Berne (Analytical Core Facility, Tufts Medical School) and Ross Tomaino (Taplin Mass Spectrometry Facility, Harvard Medical School) for performing Edman sequencing and MS/MS, respectively. We gratefully acknowledge computing resources provided by the National Supercomputing Center Singapore (<http://www.nscg.sg>). Finally, we thank Swaine Chen for critical discussions and comments on the manuscript. J.Y. was supported by the National University of Singapore Graduate School for Integrative Sciences and Engineering scholarship. J.K.M. and P.J.B. acknowledge support from the Singapore Ministry of Education Academic Research Fund Tier 3 grant (MOE2012-T3-1-008). All experimental work was supported by the National University of Singapore Start-up funding, the Singapore Ministry of Education Academic Research Fund Tier 1 and Tier 2 (MOE2013-T2-1-148) grants (to S.-S.C.).

**Conflict of Interest.** The authors declare that they have no conflicts of interest with the contents of this article.

**Author contributions:** J.Y., K.W.T., D.A.H., P.J.B. and S.-S.C designed research; J.Y., K.W.T., Z.-S.C. performed all wet lab experiments described in this work; D.A.H. and J.K.M. performed all MD simulations; J.Y., K.W.T., D.A.H., P.J.B. and S.-S.C. analyzed and discussed data; J.Y., K.W.T., and S.-S.C. wrote the paper.

## References

1. Kamio Y, Nikaido H. Outer membrane of *Salmonella typhimurium*: accessibility of phospholipid head groups to phospholipase c and cyanogen bromide activated dextran in the external medium. *Biochemistry*. 1976;15(12):2561-70.
2. Funahara Y, Nikaido H. Asymmetric localization of lipopolysaccharides on the outer membrane of *Salmonella typhimurium*. *J Bacteriol*. 1980;141(3):1463-5.
3. Nikaido H. Molecular basis of bacterial outer membrane permeability revisited. *Microbiol Mol Biol Rev*. 2003;67(4):593-656.
4. Jia W, El Zoeiby A, Petruzzello TN, Jayabalasingham B, Seyedirashti S, Bishop RE. Lipid trafficking controls endotoxin acylation in outer membranes of *Escherichia coli*. *J Biol Chem*. 2004;279(43):44966-75.
5. Wu T, McCandlish AC, Gronenberg LS, Chng SS, Silhavy TJ, Kahne D. Identification of a protein complex that assembles lipopolysaccharide in the outer membrane of *Escherichia coli*. *Proc Natl Acad Sci U S A*. 2006;103(31):11754-9.
6. Okuda S, Sherman DJ, Silhavy TJ, Ruiz N, Kahne D. Lipopolysaccharide transport and assembly at the outer membrane: the PEZ model. *Nat Rev Microbiol*. 2016;14(6):337-45.
7. Shrivastava R, Jiang X, Chng SS. Outer membrane lipid homeostasis via retrograde phospholipid transport in *Escherichia coli*. *Mol Microbiol*. 2017.
8. Dekker N. Outer-membrane phospholipase A: known structure, unknown biological function. *Mol Microbiol*. 2000;35(4):711-7.
9. Bishop RE. The lipid A palmitoyltransferase PagP: molecular mechanisms and role in bacterial pathogenesis. *Mol Microbiol*. 2005;57(4):900-12.



- 701 10. Dalebroux ZD, Matamouros S, Whittington D, Bishop RE, Miller SI. PhoPQ regulates  
702 acidic glycerophospholipid content of the Salmonella Typhimurium outer membrane. Proc Natl  
703 Acad Sci U S A. 2014;111(5):1963-8.
- 704 11. Malinverni JC, Silhavy TJ. An ABC transport system that maintains lipid asymmetry in  
705 the gram-negative outer membrane. Proc Natl Acad Sci U S A. 2009;106(19):8009-14.
- 706 12. Chong ZS, Woo WF, Chng SS. Osmoporin OmpC forms a complex with MlaA to  
707 maintain outer membrane lipid asymmetry in Escherichia coli. Mol Microbiol. 2015;98(6):1133-  
708 46.
- 709 13. Huang YM, Miao Y, Munguia J, Lin L, Nizet V, McCammon JA. Molecular dynamic  
710 study of MlaC protein in Gram-negative bacteria: conformational flexibility, solvent effect and  
711 protein-phospholipid binding. Protein Sci. 2016;25(8):1430-7.
- 712 14. Ekiert DC, Bhabha G, Isom GL, Greenan G, Ovchinnikov S, Henderson IR, et al.  
713 Architectures of Lipid Transport Systems for the Bacterial Outer Membrane. Cell.  
714 2017;169(2):273-85 e17.
- 715 15. Thong S, Ercan B, Torta F, Fong ZY, Wong HY, Wenk MR, et al. Defining key roles for  
716 auxiliary proteins in an ABC transporter that maintains bacterial outer membrane lipid  
717 asymmetry. Elife. 2016;5.
- 718 16. Pages JM, James CE, Winterhalter M. The porin and the permeating antibiotic: a  
719 selective diffusion barrier in Gram-negative bacteria. Nat Rev Microbiol. 2008;6(12):893-903.
- 720 17. Ovchinnikov S, Park H, Varghese N, Huang PS, Pavlopoulos GA, Kim DE, et al. Protein  
721 structure determination using metagenome sequence data. Science. 2017;355(6322):294-8.
- 722 18. Basle A, Rummel G, Storici P, Rosenbusch JP, Schirmer T. Crystal structure of  
723 osmoporin OmpC from E. coli at 2.0 Å. J Mol Biol. 2006;362(5):933-42.

- 724 19. Chin JW, Martin AB, King DS, Wang L, Schultz PG. Addition of a photocrosslinking  
725 amino acid to the genetic code of *Escherichia coli*. *Proc Natl Acad Sci U S A*.  
726 2002;99(17):11020-4.
- 727 20. Nakamura K, Mizushima S. Effects of heating in dodecyl sulfate solution on the  
728 conformation and electrophoretic mobility of isolated major outer membrane proteins from  
729 *Escherichia coli* K-12. *J Biochem*. 1976;80(6):1411-22.
- 730 21. Tamm LK, Hong H, Liang B. Folding and assembly of beta-barrel membrane proteins.  
731 *Biochim Biophys Acta*. 2004;1666(1-2):250-63.
- 732 22. Kozakov D, Hall DR, Xia B, Porter KA, Padhorny D, Yueh C, et al. The ClusPro web  
733 server for protein-protein docking. *Nat Protoc*. 2017;12(2):255-78.
- 734 23. Sutterlin HA, Shi H, May KL, Miguel A, Khare S, Huang KC, et al. Disruption of lipid  
735 homeostasis in the Gram-negative cell envelope activates a novel cell death pathway. *Proc Natl*  
736 *Acad Sci U S A*. 2016;113(11):E1565-74.
- 737 24. Naveed H, Jimenez-Morales D, Tian J, Pasupuleti V, Kenney LJ, Liang J. Engineered  
738 oligomerization state of OmpF protein through computational design decouples oligomer  
739 dissociation from unfolding. *J Mol Biol*. 2012;419(1-2):89-101.
- 740 25. Dong H, Xiang Q, Gu Y, Wang Z, Paterson NG, Stansfeld PJ, et al. Structural basis for  
741 outer membrane lipopolysaccharide insertion. *Nature*. 2014;511(7507):52-6.
- 742 26. Qiao S, Luo Q, Zhao Y, Zhang XC, Huang Y. Structural basis for lipopolysaccharide  
743 insertion in the bacterial outer membrane. *Nature*. 2014;511(7507):108-11.
- 744 27. Dong C, Beis K, Nesper J, Brunkan-Lamontagne AL, Clarke BR, Whitfield C, et al. Wza  
745 the translocon for *E. coli* capsular polysaccharides defines a new class of membrane protein.  
746 *Nature*. 2006;444(7116):226-9.

- 747 28. Okuda S, Tokuda H. Lipoprotein sorting in bacteria. *Annu Rev Microbiol.* 2011;65:239-  
748 59.
- 749 29. Abellon-Ruiz J, Kaptan SS, Basle A, Claudi B, Bumann D, Kleinekathofer U, et al.  
750 Structural basis for maintenance of bacterial outer membrane lipid asymmetry. *Nat Microbiol.*  
751 2017;2(12):1616-23.
- 752 30. Liu N, Delcour AH. The spontaneous gating activity of OmpC porin is affected by  
753 mutations of a putative hydrogen bond network or of a salt bridge between the L3 loop and the  
754 barrel. *Protein Eng.* 1998;11(9):797-802.
- 755 31. Khetrpal V, Mehershahi K, Rafee S, Chen S, Lim CL, Chen SL. A set of powerful  
756 negative selection systems for unmodified Enterobacteriaceae. *Nucleic Acids Res.*  
757 2015;43(13):e83.
- 758 32. Murphy KC, Campellone KG. Lambda Red-mediated recombinogenic engineering of  
759 enterohemorrhagic and enteropathogenic E. coli. *BMC Mol Biol.* 2003;4:11.
- 760 33. Ryu Y, Schultz PG. Efficient incorporation of unnatural amino acids into proteins in  
761 Escherichia coli. *Nat Methods.* 2006;3(4):263-5.
- 762 34. Slotboom DJ, Duurkens RH, Olieman K, Erkens GB. Static light scattering to  
763 characterize membrane proteins in detergent solution. *Methods.* 2008;46(2):73-82.
- 764 35. Berendsen HJC vdSD, van Drunen R GROMACS: A message-passing parallel molecular  
765 dynamics implementation. . *Comput Phys Commun* 1995;91(1-3):43-56.
- 766 36. Van Der Spoel D, Lindahl E, Hess B, Groenhof G, Mark AE, Berendsen HJ.  
767 GROMACS: fast, flexible, and free. *J Comput Chem.* 2005;26(16):1701-18.

37. Best RB, Zhu X, Shim J, Lopes PE, Mittal J, Feig M, et al. Optimization of the additive CHARMM all-atom protein force field targeting improved sampling of the backbone phi, psi and side-chain chi(1) and chi(2) dihedral angles. *J Chem Theory Comput.* 2012;8(9):3257-73.
38. Hess B BH, Berendsen HJC, Fraaije JGEM LINCS: A linear constraint solver for molecular simulations. *J Comput Chem* 1997;18(12):8577-93.
39. Essmann U, Perera L, Berkowitz ML, Darden T, Lee H, Pedersen LG. A smooth particle mesh Ewald method. *The Journal of Chemical Physics.* 1995;103(19):8577-93.
40. NosÉ S. A molecular dynamics method for simulations in the canonical ensemble. *Molecular Physics.* 2002;100(1):191-8.
41. Hoover WG. Canonical dynamics: Equilibrium phase-space distributions. *Phys Rev A Gen Phys.* 1985;31(3):1695-7.
42. Nosé S, Klein ML. Constant pressure molecular dynamics for molecular systems. *Molecular Physics.* 2006;50(5):1055-76.
43. Wolf MG, Hoefling M, Aponte-Santamaria C, Grubmuller H, Groenhof G. g\_membed: Efficient insertion of a membrane protein into an equilibrated lipid bilayer with minimal perturbation. *J Comput Chem.* 2010;31(11):2169-74.
44. Paramo T, East A, Garzon D, Ulmschneider MB, Bond PJ. Efficient Characterization of Protein Cavities within Molecular Simulation Trajectories: trj\_cavity. *J Chem Theory Comput.* 2014;10(5):2151-64.
45. Smart OS, Goodfellow JM, Wallace BA. The pore dimensions of gramicidin A. *Biophys J.* 1993;65(6):2455-60.

- 789 46. Monticelli L, Kandasamy SK, Periole X, Larson RG, Tieleman DP, Marrink SJ. The  
790 MARTINI Coarse-Grained Force Field: Extension to Proteins. *J Chem Theory Comput.*  
791 2008;4(5):819-34.
- 792 47. Marrink SJ, Risselada HJ, Yefimov S, Tieleman DP, de Vries AH. The MARTINI force  
793 field: coarse grained model for biomolecular simulations. *J Phys Chem B.* 2007;111(27):7812-  
794 24.
- 795 48. Tironi IG, Sperb R, Smith PE, van Gunsteren WF. A generalized reaction field method  
796 for molecular dynamics simulations. *The Journal of Chemical Physics.* 1995;102(13):5451-9.
- 797 49. Bussi G, Donadio D, Parrinello M. Canonical sampling through velocity rescaling. *J*  
798 *Chem Phys.* 2007;126(1):014101.
- 799 50. Berendsen HJC, Postma JPM, van Gunsteren WF, DiNola A, Haak JR. Molecular  
800 dynamics with coupling to an external bath. *The Journal of Chemical Physics.* 1984;81(8):3684-  
801 90.
- 802 51. Wassenaar TA, Pluhackova K, Bockmann RA, Marrink SJ, Tieleman DP. Going  
803 Backward: A Flexible Geometric Approach to Reverse Transformation from Coarse Grained to  
804 Atomistic Models. *J Chem Theory Comput.* 2014;10(2):676-90.
- 805 52. Zhou Z, Lin S, Cotter RJ, Raetz CR. Lipid A modifications characteristic of *Salmonella*  
806 *typhimurium* are induced by  $\text{NH}_4\text{VO}_3$  in *Escherichia coli* K12. Detection of 4-amino-4-deoxy-  
807 L-arabinose, phosphoethanolamine and palmitate. *J Biol Chem.* 1999;274(26):18503-14.
- 808 53. Laemmli UK. Cleavage of structural proteins during the assembly of the head of  
809 bacteriophage T4. *Nature.* 1970;227(5259):680-5.
- 810 54. Schagger H. Tricine-SDS-PAGE. *Nat Protoc.* 2006;1(1):16-22.

811

# Figures

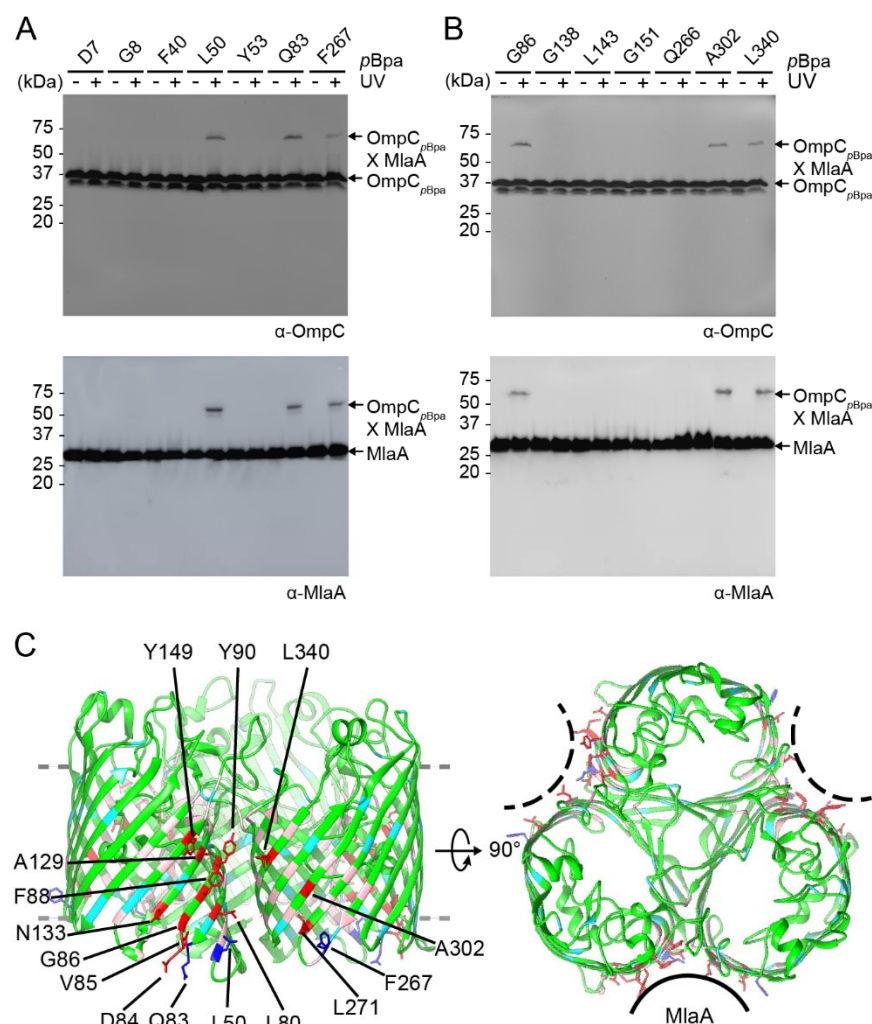

**Figure 1.** MlaA binds at the dimeric interfaces of the OmpC trimer in vivo. (A, B) Representative immunoblots showing UV-dependent formation of crosslinks between OmpC and MlaA in  $\Delta ompC$  cells expressing OmpC substituted with pBpa at indicated positions, selected in a (A) global, or (B) localized search. (C) Side (left) and top (right) views of cartoon representations of the crystal structure of *E. coli* OmpC (PDB ID: 2J1N) (18) with positions that crosslink to MlaA highlighted. Residues selected in the global search for MlaA interaction are colored *cyan* (no crosslinks) and *blue* (sticks; crosslinks detected), while those selected in the

822 localized search are colored *light pink* (no crosslinks) and *red* (sticks; crosslinks detected). The  
 823 OM boundary is indicated as gray dashed lines. MlaA binding sites are indicated as solid or  
 824 dashed curves on the top-view representation.  
 825



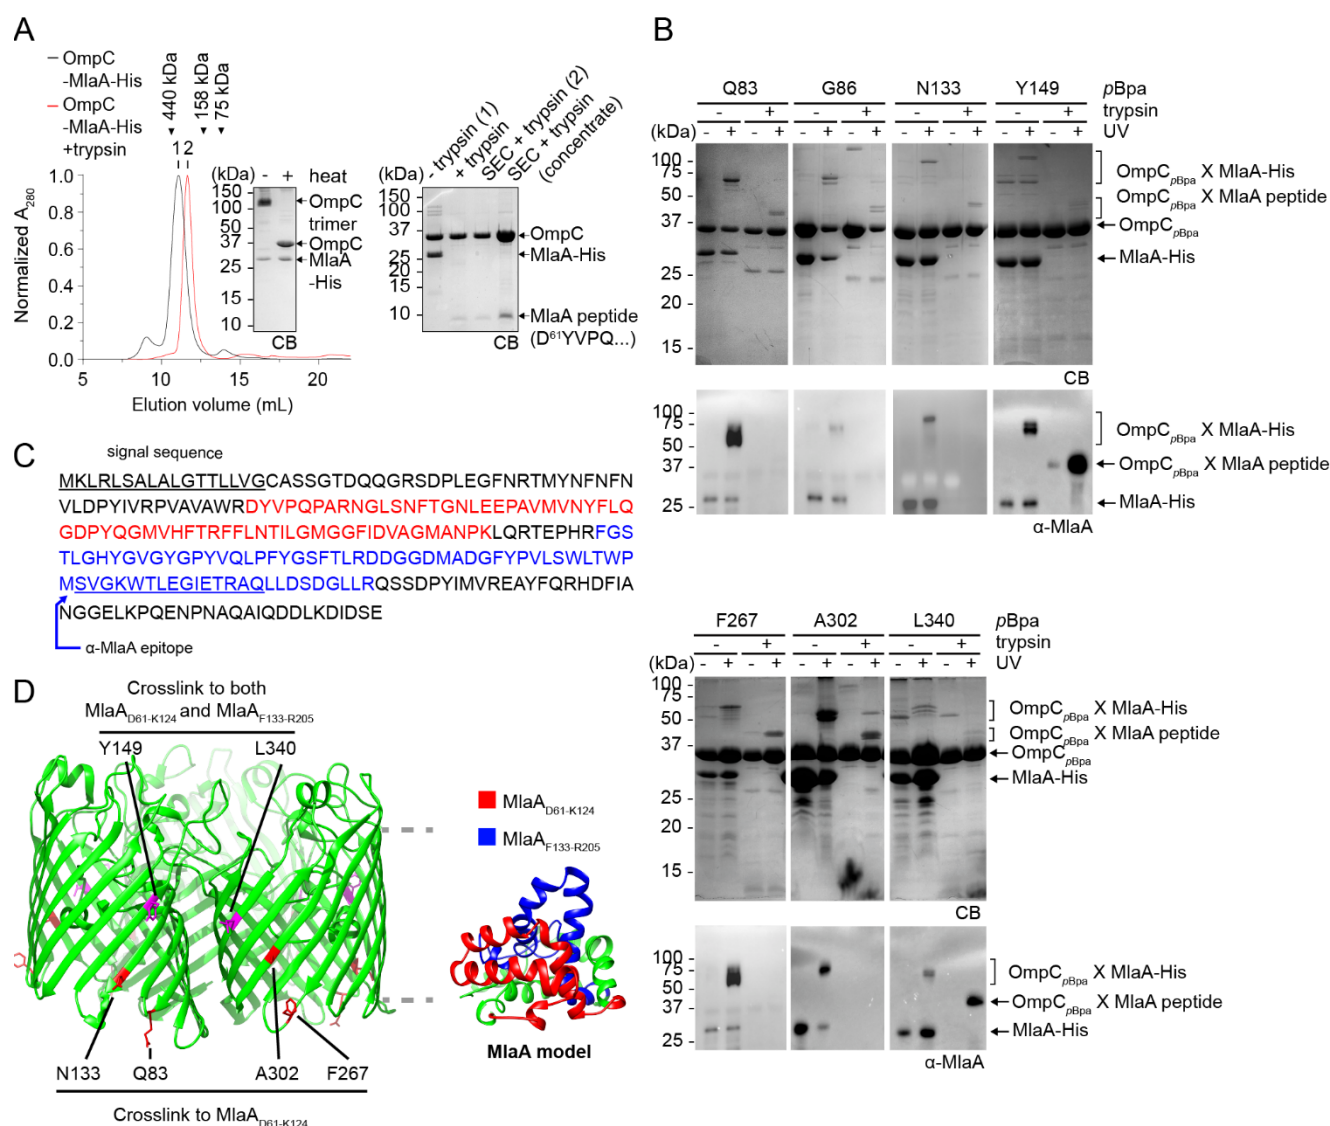

**Figure 2.** OmpC contacts two specific regions on MlaA. (A) SEC profiles and SDS-PAGE analyses of purified OmpC-MlaA-His complex before (*black*) or after (*red*) treatment with trypsin. Peak fractions from SEC were subjected to denaturing SDS-PAGE (15% Tris.HCl gel), followed by Coomassie Blue (CB) staining (*right*). Non-trypsin treated samples were also analysed by seminitative SDS-PAGE (*left*). Edman degradation and tandem MS analyses revealed that the MlaA peptide that remains bound to OmpC following trypsin treatment begins at D61 (Fig. S3). (B) SDS-PAGE (15% Tris.HCl gel) and immunoblot analyses of purified OmpC<sub>ρBpa</sub>-



834 MlaA-His complexes following sequential UV irradiation and trypsin digestion. The resulting  
 835 OmpC<sub>pBpa</sub>-MlaA<sub>peptide</sub> crosslinked products were N-terminally sequenced (see Fig. S3). (C)  
 836 Amino acid sequence of MlaA with the two peptides found crosslinked to OmpC<sub>pBpa</sub> highlighted  
 837 (*red*: MlaA<sub>D61-K124</sub>, *blue*: MlaA<sub>F133-R205</sub>). The signal sequence and  $\alpha$ -MlaA binding epitope are  
 838 underlined and annotated. (D) Cartoon representations of the crystal structure of *E. coli* OmpC  
 839 with positions that crosslink to specific MlaA peptides indicated (*left*), and a structural model of  
 840 MlaA (17) with peptides crosslinked by OmpC<sub>pBpa</sub> highlighted (*right*). The OM boundary is  
 841 indicated as gray dashed lines.

842

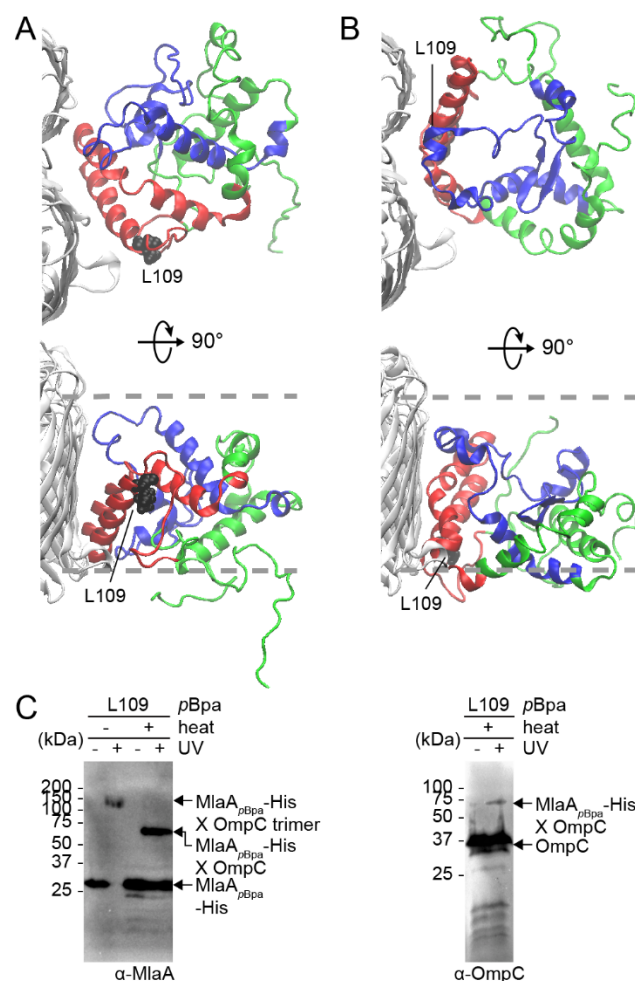

**Figure 3.** Molecular models of the OmpC-MlaA complex depict how MlaA may interact with OmpC in the OM bilayer. (A) and (B) Representative MlaA structures bound to OmpC in two possible orientations selected from all-atomistic MD simulation trajectories. MlaA<sub>D61-K124</sub> and MlaA<sub>F133-R205</sub> peptides are highlighted in *red* and *blue*, respectively, as in Fig. 2D. L109 is labelled and depicted as *black* spheres on MlaA. The OM boundaries are indicated as *gray* dashed lines. (C) Immunoblots showing UV-dependent formation of a crosslink between MlaA and OmpC in  $\Delta mlaA$  cells expressing MlaA<sub>L109pBpa</sub>-His. As expected, the crosslinked product also exhibits heat-modifiable gel shift, indicative of the presence of OmpC.

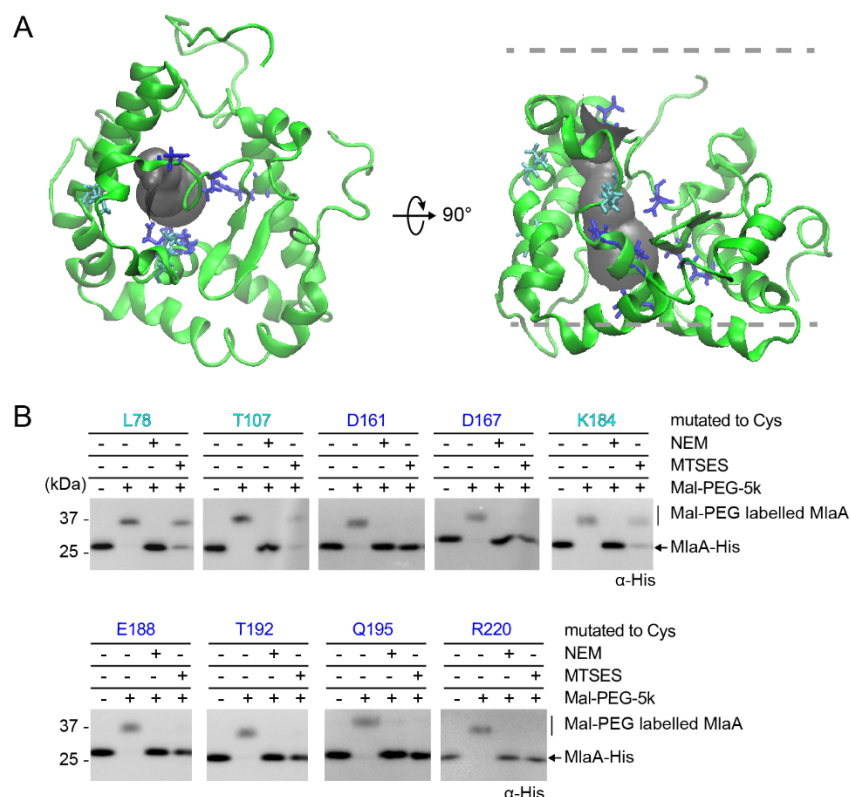

**Figure 4.** MlaA forms a hydrophilic channel in the OM. (A) A representative structure of MlaA from all-atomistic MD simulations with its putative channel depicted in *gray*. Residues in the channel that are fully or partially solvent accessible, based on SCAM in (B), are highlighted in *blue* and *cyan*, respectively. (B) Immunoblots showing maleimide-polyethylene glycol (Mal-PEG) alkylation of MlaA variants containing channel-facing residues substituted with cysteine (as depicted in (A)) following labelling by membrane permeable *N*-ethylmaleimide (NEM) or impermeable (MTSES) reagents. Mal-PEG alkylated MlaA<sub>Cys</sub>-His variants show a ~5 kDa mass shift. Positions fully or partially blocked by MTSES, which reflects the level of solvent accessibility, are highlighted in *blue* or *cyan*, respectively.

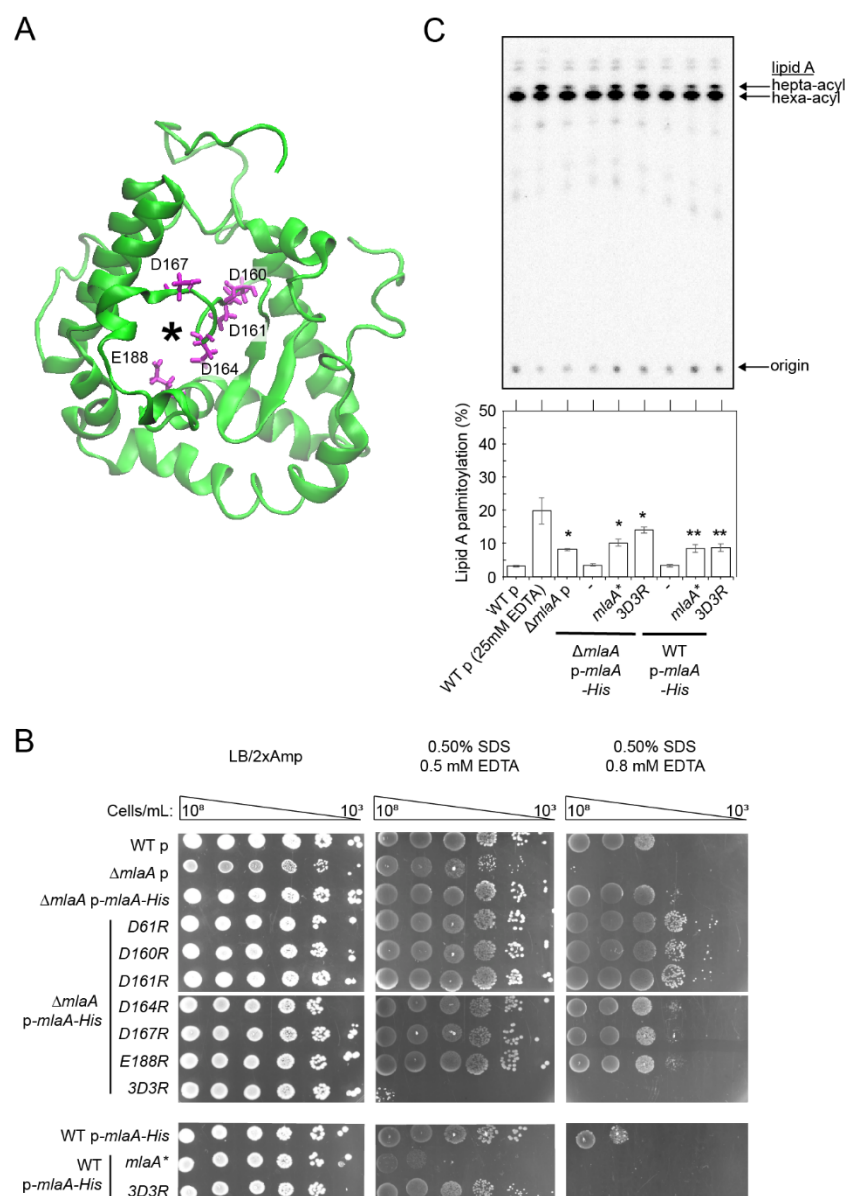

**Figure 5.** A triple charge-inversion mutation in the hydrophilic channel within MlaA results in gain-of-function phenotypes. (A) A representative structure of MlaA from all-atomistic MD simulations (as in Fig. 3, top view) with position of the channel depicted by an asterisk. Negatively charged residues mutated to arginine are highlighted (magenta, in sticks). (B) Analysis of SDS/EDTA sensitivity of wild-type (WT) and  $\Delta mlaA$  strains producing indicated MlaA variants at low levels from the pET23/42 vector (p) (12). Serial dilutions of respective cultures were spotted on LB agar plates containing Amp, supplemented with or without 0.50%

872 SDS and 0.5/0.8 mM EDTA, as indicated, and incubated overnight at 37 °C. (C) Representative  
 873 thin layer chromatography (TLC)/autoradiographic analysis of [<sup>32</sup>P]-labeled lipid A extracted  
 874 from exponential phase cultures of strains described in (B). As a positive control for lipid A  
 875 palmitoylation, WT cells were treated with 25 mM EDTA for 10 min prior to extraction. Equal  
 876 amounts of radioactive material were spotted for each sample. Average percentages of  
 877 palmitoylation of lipid A and the standard deviations were quantified from triplicate experiments  
 878 and plotted below. Student's t-tests: \*,  $p < 0.005$  compared to WT with empty vector; \*\*,  $p <$   
 879 0.001 compared to WT *p-mlaA-His*.

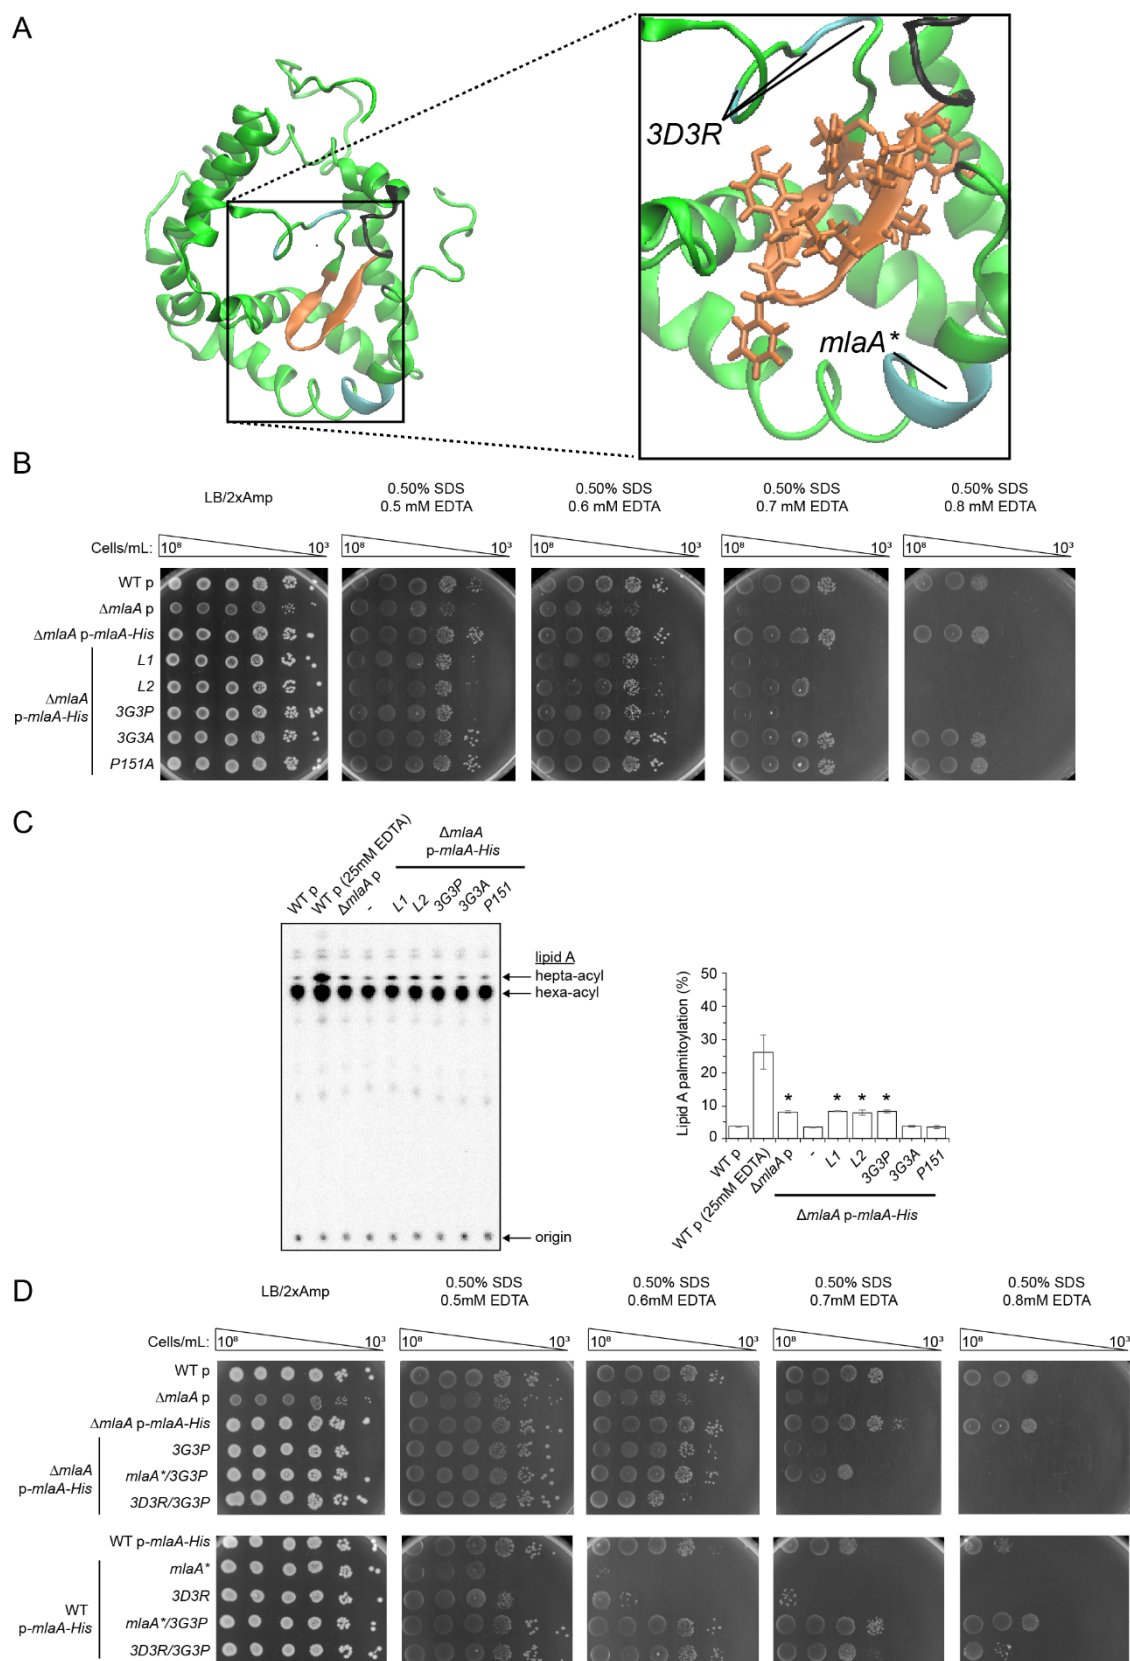

881 **Figure 6.** Flexibility in a hairpin loop structure on MlaA adjacent to the hydrophilic channel is  
 882 critical for function. (A) A representative structure of MlaA from all-atomistic MD simulations  
 883 (as in Fig. 3B) with the hairpin loop adjacent to the hydrophilic channel highlighted. In the  
 884 expanded representation, the *3D3R* and *m1aA\** mutations, the hairpin loop, and the glycine rich  
 885 region N-terminal to the loop are colored in *cyan*, *orange* and *black*, respectively. Residues on  
 886 the hairpin loop chosen for mutation are represented in sticks. (B) Analysis of SDS/EDTA  
 887 sensitivity of wild-type (WT) and  $\Delta m1aA$  strains producing indicated MlaA loop variants from  
 888 the pET23/42 vector (p). (C) Representative TLC/autoradiographic analysis of [ $^{32}$ P]-labeled lipid  
 889 A extracted from exponential phase cultures of strains described in (B). Equal amounts of  
 890 radioactive material were spotted for each sample. Average percentages of palmitoylation of  
 891 lipid A and the standard deviations were quantified from triplicate experiments and plotted on  
 892 the right. Student's t-tests: \*,  $p < 0.0005$  compared to WT with empty vector. (D) Analysis of  
 893 SDS/EDTA sensitivity of wild-type (WT) and  $\Delta m1aA$  strains producing indicated MlaA variants  
 894 from the pET23/42 vector (p).



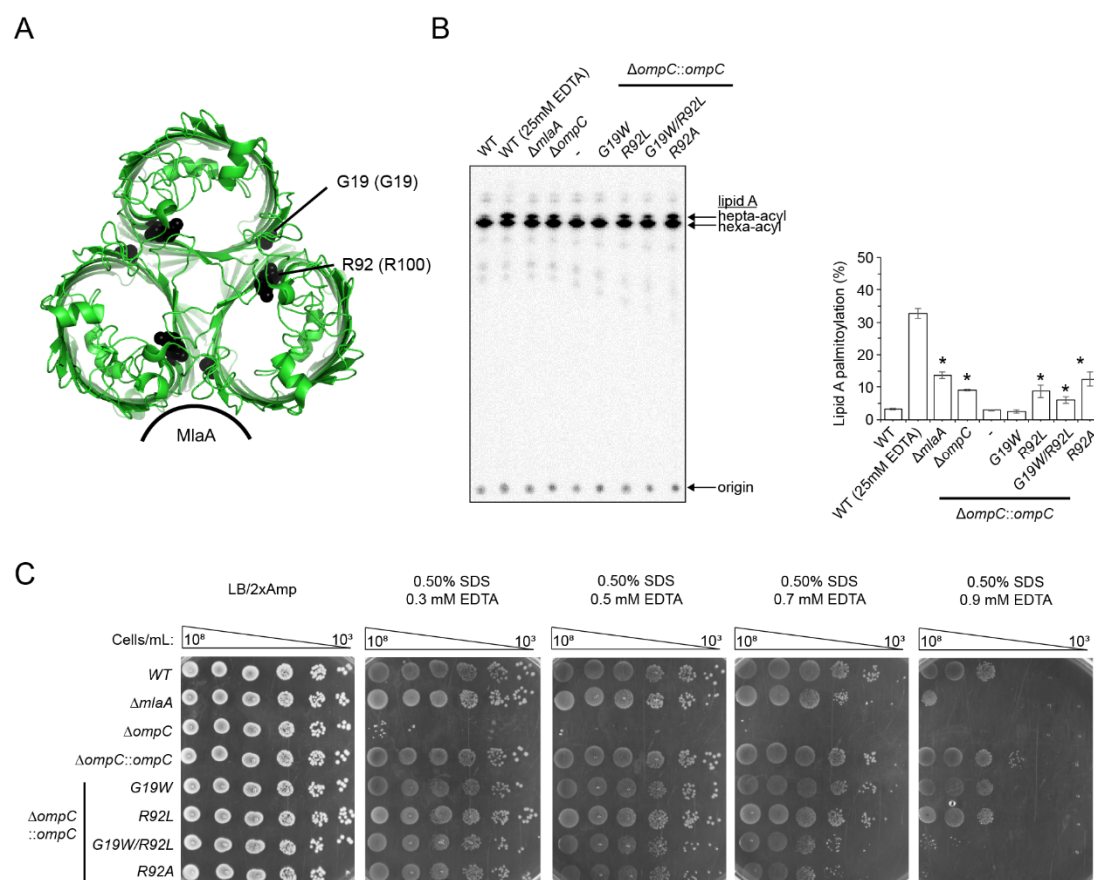

**Figure 7.** A specific mutation in the dimeric interface of the OmpC trimer results in perturbation in OM lipid asymmetry. (A) Cartoon representation of the crystal structure of OmpC trimer illustrating the positions of G19 and R92 region. (B) Analysis of SDS/EDTA sensitivity of wild-type (WT) and  $\Delta ompC$  strains producing indicated OmpC variants from the chromosomal locus. (C) Representative TLC/autoradiographic analysis of  $[^{32}P]$ -labeled lipid A extracted from stationary phase cultures of strains described in (B). Equal amounts of radioactive material were spotted for each sample. Average percentages of palmitoylation of lipid A and the standard deviations were quantified from triplicate experiments and plotted on the right. Student's t-tests: \*,  $p < 0.005$  compared to  $\Delta ompC::ompC$ .
