1 **Molecular basis for the maintenance of lipid asymmetry in the outer membrane of**  
2 ***Escherichia coli***

3

4 Jiang Yeow<sup>a,b,1</sup>, Kang Wei Tan<sup>a,1</sup>, Daniel A. Holdbrook<sup>c,1</sup>, Zhi-Soon Chong<sup>a</sup>, Jan K. Marzinek<sup>c,d</sup>,  
5 Peter J. Bond<sup>c,d,\*</sup>, Shu-Sin Chng<sup>a,e,\*</sup>

6

7 <sup>a</sup>Department of Chemistry, National University of Singapore, Singapore 117543, <sup>b</sup>National  
8 University of Singapore Graduate School for Integrative Sciences and Engineering (NGS),  
9 Singapore 117456, <sup>c</sup>Bioinformatics Institute, Agency for Science, Technology, and Research  
10 (A\*STAR), Singapore 138671, <sup>d</sup>Department of Biological Sciences, National University of  
11 Singapore, Singapore 117543, <sup>e</sup>Singapore Center for Environmental Life Sciences Engineering,  
12 National University of Singapore (SCELSE-NUS), Singapore 117456.

13

14 <sup>1</sup>These authors contributed equally to this work.

15 \*To whom correspondence should be addressed: Shu-Sin Chng, Department of Chemistry,  
16 National University of Singapore, Singapore 117543, E-mail: [chmchngs@nus.edu.sg](mailto:chmchngs@nus.edu.sg). Peter J.  
17 Bond, Bioinformatics Institute, Agency for Science, Technology, and Research (A\*STAR),  
18 Singapore 138671, Email: [peterjb@bii.a-star.edu.sg](mailto:peterjb@bii.a-star.edu.sg)

19

20 **Abstract**

21 A distinctive feature of the Gram-negative bacterial cell envelope is the asymmetric outer  
22 membrane (OM), where lipopolysaccharides (LPS) and phospholipids (PLs) reside in the outer  
23 and inner leaflets, respectively. This unique lipid asymmetry renders the OM impermeable to  
24 external insults. In *Escherichia coli*, the OmpC-MlaA complex is believed to maintain lipid  
25 asymmetry by removing mislocalized PLs from the outer leaflet of the OM. How it performs this  
26 function is unknown. Here, we define the molecular architecture of the OmpC-MlaA complex to  
27 gain insights into its role in PL transport. We establish that MlaA sits entirely within the bilayer  
28 in complex with OmpC and provides a hydrophilic channel possibly for PL translocation across  
29 the OM. Furthermore, we show that flexibility in a hairpin loop adjacent to the channel  
30 modulates MlaA activity. Finally, we demonstrate that OmpC plays an active role in maintaining  
31 OM lipid asymmetry together with MlaA. Our work offers glimpses into how the OmpC-MlaA  
32 complex transports PLs across the OM and has important implications for future antimicrobial  
33 drug development.

34

## 35 **Introduction**

36           The outer membrane (OM) of Gram-negative bacteria is an extremely asymmetric  
37 bilayer, comprising lipopolysaccharides (LPS) in the outer leaflet and phospholipids (PLs) in the  
38 inner leaflet (1, 2). LPS molecules pack tightly together in the presence of divalent cations to  
39 form an outer layer with markedly reduced fluidity and permeability (3). Thus, the OM serves as  
40 an effective barrier against toxic compounds including detergents and antibiotics. This function  
41 is fully dependent on the establishment and maintenance of lipid asymmetry; cells generally  
42 become more sensitive to external insults when OM lipid asymmetry is disrupted, which is  
43 typically characterized by the accumulation of PLs in the outer leaflet (4, 5). The OM is also  
44 essential for viability.

45           The requisite lipid asymmetry of the OM is likely initially established by direct  
46 placement of LPS and PLs into the outer and inner leaflets, respectively. LPS assembly into the  
47 outer leaflet of the OM is mediated by the well-established Lpt (lipopolysaccharide transport)  
48 machinery (6), but proteins that transport and insert PLs into the inner leaflet have not been  
49 identified. For entropic reasons, there is a natural tendency for PLs to appear in the outer leaflet  
50 of the OM, although how they traverse the bilayer is unclear. This occurs more readily with  
51 perturbations in the OM, especially when assembly of other OM components is disrupted (4, 5,  
52 7). Since loss of lipid asymmetry compromises the barrier function of the OM, several  
53 mechanisms exist to remove PLs aberrantly localized in the outer leaflet of the membrane: (i) the  
54 OM phospholipase OmpLA hydrolyzes both acyl chains from outer leaflet PLs (8), (ii) the OM  
55 acyltransferase PagP transfers an acyl chain from outer leaflet PLs to LPS (9) or  
56 phosphatidylglycerol (PG) (10), and (iii) the OmpC-Mla system, a putative PL trafficking  
57 pathway, removes outer leaflet PLs and shuttles them back to the inner membrane (IM) (11, 12).

58           The OmpC-Mla system comprises seven proteins located across the cell envelope.  
59   Removing any component results in PL accumulation in the outer leaflet of the OM, and  
60   therefore sensitivity to SDS/EDTA (11, 12). The OM lipoprotein MlaA forms a complex with  
61   osmoporin OmpC that likely extracts PLs from the outer leaflet of the OM (12). The periplasmic  
62   protein MlaC serves as a lipid chaperone and is proposed to transport lipids from the OmpC-  
63   MlaA complex to the IM (11, 13, 14). At the IM, MlaF and MlaE constitute an ATP-binding  
64   cassette (ABC) family transporter together with two auxiliary proteins, MlaD and MlaB (14, 15);  
65   this complex presumably receives PLs from MlaC and inserts them into the membrane. MlaD  
66   has been shown to bind PLs, while MlaB is important for both assembly and activity of the  
67   transporter (15). Recently, the function of the OmpC-Mla system in retrograde (OM-to-IM) PL  
68   transport has been demonstrated in *E. coli* (7).

69           The molecular mechanism by which the OmpC-MlaA complex extracts PLs from the  
70   outer leaflet of the OM, presumably in an energy-independent manner, is an interesting problem.  
71   Aside from the LptDE machine, which assembles LPS on the surface (4, 5), the OmpC-MlaA  
72   complex is the only other system proposed to catalyze the translocation of lipids across the OM.  
73   OmpC is a classical trimeric porin that typically only allows passage of hydrophilic solutes  
74   across the OM (3, 16), while MlaA is believed to be anchored to the inner leaflet of the  
75   membrane; how the two proteins are organized in a complex for the translocation of amphipathic  
76   PLs is not known. In this paper, we establish that MlaA is in fact an integral membrane protein  
77   that forms a channel adjacent to OmpC trimers in the OM, likely allowing the passage of PLs.  
78   We first demonstrated that MlaA binds the OmpC trimer within the OM bilayer by mapping the  
79   interaction surfaces using *in vivo* crosslinking. Using a recently predicted structural model of  
80   MlaA (17), we obtained molecular views of the OmpC-MlaA complex by molecular dynamics

81 (MD) simulations, and experimentally established the existence of a hydrophilic channel within  
82 OM-embedded MlaA. Combining charge mutations in this channel modulated MlaA activity,  
83 suggesting functional importance. Furthermore, mutations altering the flexibility of a hairpin  
84 loop that could interact with the hydrophilic channel led to predictable in vivo effects on MlaA  
85 function. Finally, we identified a key residue on OmpC found at the OmpC-MlaA interacting  
86 surface that is important for proper function of the complex. Our findings provide important  
87 mechanistic insights into how PLs may be translocated across the OM to ensure proper lipid  
88 asymmetry.

89

## 90 **Results**

### 91 **The OmpC trimer contacts MlaA directly along its membrane-facing dimeric interfaces.**

92 To develop a detailed architectural understanding of the OmpC-MlaA complex, we  
93 carried out in vivo photocrosslinking to map intermolecular interactions within the complex.  
94 Guided by the crystal structure of the OmpC trimer (18), we introduced the UV-crosslinking  
95 amino acid, *para*-benzoyl-L-phenylalanine (*p*Bpa), at 49 positions in OmpC via amber  
96 suppression (19). Initial selection focused on residues that are either solvent-accessible (i.e. loop  
97 and lumen) or located near the membrane-water boundaries (i.e. aromatic girdle). Upon UV  
98 irradiation, a ~65 kDa crosslinked band that contains both OmpC (~37 kDa) and MlaA (~28  
99 kDa) could be detected in cells expressing OmpC variants substituted with *p*Bpa at three  
100 positions (L50, Q83, or F267) (Fig. 1A). These residues are found on the periplasmic turns at the  
101 dimeric interfaces of the OmpC trimer (Fig. 1C), thus localizing possible binding sites for MlaA.  
102 We have previously proposed that OmpC may allow MlaA to traverse the bilayer and gain  
103 access to PLs that have accumulated in the outer leaflet of the OM (12). As none of the six  
104 selected residues in the OmpC lumen crosslinked to MlaA, we decided to probe for interactions

105 between MlaA and the membrane-facing side walls of OmpC, specifically around the dimeric  
106 interfaces of the OmpC trimer. Remarkably, out of the additional 49 positions tested in this  
107 region, 10 residues allowed photoactivated crosslinks between OmpC and MlaA when replaced  
108 with *p*Bpa (Fig. 1B and Fig. S1). In total, these 13 crosslinking residues clearly demarcate an  
109 extensive MlaA-interacting surface on OmpC (Fig. 1C). This explains why OmpC exhibits  
110 strong interactions and can be co-purified with MlaA on an affinity column, as we have  
111 previously reported (12). Two positions, Y149 and L340, are located right at or near the  
112 membrane-water boundary exposed to the extracellular environment, suggesting that MlaA  
113 traverses the entire width of the OM. We conclude that MlaA binds along the dimeric interfaces  
114 of the OmpC trimer in the membrane.

115

116 **Two specific regions on MlaA contact the membrane-facing dimeric interfaces of the**  
117 **OmpC trimer.**

118 We sought to map in greater detail the OmpC-MlaA interacting surface in vitro. To do  
119 that, we first overexpressed and purified the OmpC-MlaA complex to homogeneity. We showed  
120 that this complex forms a single peak on size exclusion chromatography (SEC) (Fig. 2A). OmpC  
121 within this complex exhibits the characteristic heat-modifiable gel shift commonly observed for  
122 OM  $\beta$ -barrel proteins (20), consistent with the presence of the folded trimer. Multi-angle light  
123 scattering (MALS) analysis revealed that one copy of MlaA interacts with the OmpC trimer (Fig.  
124 S2), suggesting that only one of the three dimeric interfaces within the trimer is available for  
125 binding (Fig. 1C). We next performed protease digestion experiments to identify specific  
126 region(s) on MlaA that may interact stably with OmpC. OM  $\beta$ -barrel proteins such as OmpC are  
127 known to be protease-resistant (21). Given that some parts of MlaA contact OmpC within the  
128 membrane, we expect these bound regions to also be protected from proteolytic degradation.

129 Treatment of the purified OmpC-MlaA complex with trypsin results in almost complete  
130 degradation of MlaA, with the OmpC trimer remaining intact (Fig 2A). Following SEC,  
131 however, we found that an ~8 kDa peptide (presumably from MlaA) remains stably bound to the  
132 trimer. N-terminal sequencing and tandem mass spectrometry (MS) analyses revealed that this  
133 peptide corresponds to MlaA<sub>D61-K124</sub> (Figs. 2A and 2C, and Fig. S3). These results suggest that  
134 MlaA interacts strongly with OmpC in the membrane in part via this specific region.

135 To define how OmpC contacts the MlaA<sub>D61-K124</sub> peptide, we next attempted to  
136 overexpress and purify *pBpa*-containing OmpC variants in complex with MlaA, and determine  
137 which of the previously identified 13 OmpC residues interacts with MlaA<sub>D61-K124</sub> in vitro. We  
138 sequentially performed UV crosslinking and trypsin digestion to potentially link MlaA<sub>D61-K124</sub> to  
139 specific residues on OmpC. This approach may also allow trapping of other potential interacting  
140 regions of MlaA, which might not have been stably retained on the wild-type complex after  
141 trypsin digestion. We successfully detected trypsin-resistant crosslinked products for seven  
142 OmpC<sub>*pBpa*</sub>-MlaA complexes (Fig. 2B); these appeared slightly above OmpC between 37 to 50  
143 kDa, indicating that peptides in the range of ~6-10 kDa are crosslinked to OmpC. N-terminal  
144 sequencing of six of the seven adducts showed the presence of OmpC, and an MlaA peptide  
145 beginning at residue D61 (Figs. 2C and 2D, and Fig. S3C). Given the approximate sizes of the  
146 crosslinked adducts, we concluded that all these residues interact with MlaA<sub>D61-K124</sub>.  
147 Interestingly, an additional peptide on MlaA starting at residue F133 was also found to crosslink  
148 at two (Y149 and L340) of these six positions on OmpC (Figs. 2B–D, and Fig. S3C). These  
149 adducts can be detected by an  $\alpha$ -MlaA antibody that recognizes an epitope within V182-Q195 on  
150 MlaA (Fig. 2B), suggesting that a peptide from F133 to at least R205 (next trypsin cleavage site)

151 may be crosslinked (Fig. 2C). Thus, in addition to MlaA<sub>D61-K124</sub>, our crosslinking strategy  
152 revealed a second point of contact (MlaA<sub>F133-R205</sub>) between OmpC and MlaA.

153 At the point of these findings, there was no available molecular structure for MlaA;  
154 however, a structural model has been predicted based on residue-residue contacts inferred from  
155 co-evolution analysis of metagenomic sequence data (17). Using a rigorously-validated quality  
156 score, this method of structure determination has generated reliable models for 614 protein  
157 families with currently unknown structures. We experimentally validated the model for MlaA by  
158 replacing residue pairs far apart on the primary sequence with cysteines, and showed that only  
159 those that are highly co-evolved (and predicted to be residue-residue contacts) allow disulfide  
160 bond formation in cells (Fig. S4). We therefore proceeded to use this MlaA model to understand  
161 the organization of the OmpC-MlaA complex. Interestingly, the positions of the two OmpC-  
162 contacting peptides on the MlaA model are spatially separated in a way consistent with the  
163 arrangement of the residues on OmpC that crosslink to each peptide (Fig. 2D). This not only  
164 reveals how MlaA may potentially be oriented and organized around the dimeric interface of the  
165 OmpC trimer, but also suggests that the entire MlaA molecule may reside in the membrane. In  
166 fact, the overall surface of MlaA, other than the putative periplasmic-facing region, is largely  
167 hydrophobic (Fig. S5). Furthermore, using all-atomistic MD simulations, we found that the  
168 structural fold of MlaA appears to be more stable in a lipid bilayer than in an aqueous  
169 environment (Fig. S6). Consistent with this, we note that even without its N-terminal lipid  
170 anchor, MlaA is not a soluble protein, and can only be extracted and purified from the OM in the  
171 presence of detergent. Collectively, these observations lend strong support to the validity of the  
172 predicted MlaA structure.

173



174 **MlaA provides a hydrophilic channel that may allow PL translocation across the OM.**

175 To obtain a physical picture of how OmpC interacts with MlaA within the complex, we  
176 used MD simulations to dock MlaA onto the OmpC trimer within a PL bilayer. Using a  
177 previously reported protocol (22), we first docked the MlaA model onto the OmpC trimer  
178 structure, both as rigid bodies. Interestingly, all initial docked structures contained MlaA binding  
179 at one dimeric interface of OmpC. Based on information derived from crosslinking, we selected  
180 two most consistent models differing slightly in how MlaA is oriented with respect to OmpC for  
181 unrestrained refinements using all-atomistic simulations. Multiple simulations were run for each  
182 MlaA orientation in a PL bilayer until overall root-mean-square deviations (RMSD) stabilized;  
183 remarkably, the resulting equilibrium models fulfilled all observed experimental crosslinking  
184 data. We performed clustering on all available trajectories, and identified the most populated  
185 conformations of the OmpC-MlaA complex in our simulations (Fig. 3A and Fig. S7A for one  
186 MlaA orientation, and Fig. 3B and Fig. S7B for the other). These conformational models all  
187 show MlaA sitting in the bilayer, tucked nicely into the dimeric interface of the OmpC trimer.  
188 Evidently, the MlaA<sub>D61-K124</sub> peptide interacts extensively with OmpC in these models, consistent  
189 with why this peptide remains stably bound to OmpC after protease digestion (Fig. 2A). We also  
190 mutated several MlaA residues found at the OmpC-MlaA interfaces to *p*Bpa, and performed in  
191 vivo crosslinking experiments. We identified one position L109 that allowed strong  
192 photoactivatable crosslinking to OmpC when replaced with *p*Bpa (Fig. 3C). This residue lies  
193 within the MlaA<sub>D61-K124</sub> peptide (Figs. 3A and 3B), confirming that this region does in fact  
194 contact OmpC in cells.

195 One striking feature present in all the simulated OmpC-MlaA structures is a negatively-  
196 charged hydrophilic channel within MlaA that spans the lipid bilayer (Fig. 4A, and Fig. S8).

197 Based on its function in removing PLs from the outer leaflet of the OM, we hypothesize that this  
198 channel may allow passage of charged headgroups as PLs translocate across the membrane. To  
199 test the existence of this hydrophilic channel in MlaA in cells, we selected 27 residues in and  
200 around the putative channel in a representative model (Fig. 4, and Fig. S9), and determined their  
201 solvent accessibility using the substituted cysteine accessibility method (SCAM). We first  
202 showed that these cysteine mutants are functional (Fig. S9C). Solvent-exposed residues are  
203 expected to be reactive with the charged membrane-impermeable thiol-labelling reagent, sodium  
204 (2-sulfonatoethyl)methanethiosulfonate (MTSES). Remarkably, we found that residues predicted  
205 to be within the putative channel (Figs. 4A and 4B) or at the membrane-water boundaries (Figs.  
206 S9A and S9B) are indeed accessible to MTSES. We therefore conclude that MlaA forms a  
207 hydrophilic channel in the OM in cells.

208 To ascertain whether this channel is functionally important, we separately mutated 19  
209 polar and (negatively) charged residues near or within the channel to alanine or arginine, and  
210 tested for MlaA function. However, all of these MlaA mutants are functional (Fig. 5B, and Fig.  
211 S10A), indicating that single residue changes are not sufficient to perturb channel properties to  
212 affect PL transport. We noticed that four (D160, D161, D164, and D167) of the five negatively-  
213 charged channel residues are in close proximity (Fig. 5A). To alter channel properties more  
214 drastically, we combined arginine mutations for these aspartates; interestingly, only the  
215 D161R/D167R double mutant (Fig. S10B) and D160R/D161R/D164R triple mutant (MlaA<sub>3D3R</sub>)  
216 disrupted function; cells expressing these variants are highly sensitive to SDS/EDTA (Fig. 5B,  
217 and Fig. S10B). For the MlaA<sub>3D3R</sub> mutant, this is likely due to the accumulation of PLs in the  
218 outer leaflet of the OM (as judged by PagP-mediated acylation of LPS; Fig. 5C). In fact, this  
219 mutant exhibits OM defects that are more pronounced than the  $\Delta mlaA$  strain (Fig. 5B),

220 suggesting gain of function. Consistent with this idea, the *3D3R* mutation gives rise to the same  
221 defects in strains also expressing the wild-type *mIaA* allele, revealing a dominant negative  
222 phenotype (Figs. 5B and 5C). We showed that MlaA<sub>3D3R</sub> is produced at levels comparable to  
223 wild-type MlaA on a plasmid (Fig. S11A), and is still able to interact strongly with OmpC (Fig.  
224 S11B). Taken together, these results suggest that the MlaA channel plays a functional role in  
225 maintenance of lipid asymmetry.

226

### 227 **Flexibility of a hairpin loop adjacent to the channel on MlaA is required for function.**

228 The gain-of-function/dominant negative phenotype of the *mIaA*<sub>3D3R</sub> mutant is similar to a  
229 previously reported *mIaA*\* (or *mIaA*<sub>ΔNF</sub>) mutant (Figs. 5B and 5C) (23), suggesting that these  
230 mutations may have similar effects on MlaA structure and/or function. Interestingly, the  
231 positions of these mutations on the OmpC-MlaA models flank a hydrophobic hairpin loop  
232 (G141-L158) within MlaA (Fig. 6A). Therefore, we hypothesized that the loop could play a  
233 functional role in MlaA, and that these mutations may affect interactions with this loop. To  
234 examine this possibility, we created three separate mutations at the hairpin structure and tested  
235 each variant for MlaA function. Two of these mutations, Y<sup>147</sup>VQL→4A (*L1*) and  
236 F<sup>152</sup>YGSF→5A (*L2*), are designed to disrupt interactions with other regions of MlaA. The other  
237 mutation, P151A, removes a proline that may be critical for the hairpin turn structure. The N-  
238 terminus of the loop is connected to the rest of MlaA via an unstructured glycine-rich linker,  
239 which we reasoned may influence conformation of the entire hairpin structure. Thus, we  
240 constructed two additional mutants, G<sup>141</sup>VGYG→A<sup>141</sup>VAYA (*3G3A*) and  
241 G<sup>141</sup>VGYG→P<sup>141</sup>VPYP (*3G3P*), to reduce possible flexibility in this region. Remarkably, *L1*,  
242 *L2*, and *3G3P* mutations resulted in similar extents of SDS/EDTA sensitivity (Fig. 6B), as well

243 as OM outer leaflet PL accumulation (Fig. 6C), when compared to the  $\Delta mlaA$  mutation. Given  
244 that these mutations also do not affect MlaA levels or interaction with OmpC (Fig. S11), we  
245 conclude that they are loss-of-function mutations. The hairpin loop, along with its surrounding  
246 structures, forms an important functional region on MlaA.

247 Phenotypes observed for the loop rigidifying mutation (*3G3P*) and gain-of-function  
248 mutations (*3D3R* and *mlaA\**) suggest that flexibility in the hairpin loop is critical for MlaA  
249 function. We hypothesize that the hairpin loop may exist in two distinct conformations. The  
250 *3D3R* or *mlaA\** mutations could alter interactions with the loop, resulting in it adopting one  
251 conformation, and somehow giving rise to gain-of-function/dominant negative phenotypes; in  
252 the case of *mlaA\**, it was proposed that this mutation caused MlaA to be in a “leaky” or “open”  
253 state, and allowed PLs to flip out to the outer leaflet of the OM (23). In contrast, the *3G3P*  
254 mutation may lock the hairpin loop in a second conformation, where MlaA is in a “closed” state,  
255 thus abolishing function in PL transport. If these were true, we predict that rigidification of the  
256 hairpin loop with the *3G3P* mutation would be able to correct gain-of-function/dominant  
257 negative phenotypes observed in the *3D3R* and/or *mlaA\** mutants. Indeed, the *3G3P/3D3R* and  
258 *3G3P/mlaA\** combination mutants no longer exhibit gain-of-function/dominant negative  
259 phenotypes, but behave like the *3G3P* or null mutants (Fig. 6D). Again, these variants are  
260 expressed at comparable levels to the single mutants, and still interact with OmpC (Fig. S11).  
261 Taken together, these results indicate clear importance of dynamics in the hairpin loop in  
262 controlling the function of MlaA.

263

264 **A specific residue in the dimeric interface of OmpC is important for its function in**  
265 **maintaining lipid asymmetry.**

266           Given that MlaA sits in the membrane and provides a channel that putatively allows  
267 movement of PLs across the OM, it is not clear why it should bind at one of the dimeric  
268 interfaces of OmpC trimers, and what the exact role of OmpC may be. To understand the  
269 importance of OmpC-MlaA interaction, we attempted to engineer monomeric OmpC constructs  
270 that we predict would no longer interact with MlaA. We installed specific mutations (G19W  
271 and/or R92L) in OmpC that were found previously to disrupt the oligomerization state of its  
272 homolog OmpF (G19W and R100L correspondingly) in vitro (24) (Fig. 7A). Both the OmpC<sub>G19W</sub>  
273 and OmpC<sub>R92L</sub> single mutants can interact with MlaA, and still form trimers in vitro, albeit  
274 slightly destabilized compared to wild-type OmpC (Fig. S12). Combination of these mutations  
275 further weakens the OmpC trimer, with noticeable monomer population at physiological  
276 temperature. Intriguingly, both the double mutant and the R92L single mutant accumulated PLs  
277 in the outer leaflet of the OM (Fig. 7B), indicating that R92 is important for the role of OmpC in  
278 OM lipid asymmetry. Consistent with this idea, we demonstrated that cells expressing the  
279 OmpC<sub>R92A</sub> variant also exhibit perturbations in OM lipid asymmetry. We further showed that all  
280 these *ompC* alleles can rescue severe SDS/EDTA sensitivity known for cells lacking OmpC (Fig.  
281 7C), suggesting normal porin function; however, cells expressing OmpC<sub>G19W/R92L</sub> and OmpC<sub>R92A</sub>,  
282 unlike WT and OmpC<sub>R92L</sub>, are still sensitive to SDS at higher concentrations of EDTA. These  
283 phenotypes mirror those observed for cells lacking MlaA, suggesting the loss of Mla function in  
284 these mutant strains. It appears that the R92 residue is critical for this function, although it is not  
285 clear why the single R92L mutation did not result in SDS/EDTA sensitivity. The exact role of  
286 R92 is not known, but the phenotypes observed for the single R92A mutation cannot be due to  
287 disruption of OmpC trimerization (Fig. S12). We conclude that OmpC has an active role in  
288 maintaining OM lipid symmetry together with MlaA.

## 289 **Discussion**

290

291 Osmoporin OmpC interacts with MlaA to maintain lipid asymmetry in the OM; how this  
292 complex is organized to extract PLs from the outer leaflet of the OM is not known. In this study,  
293 we have employed photoactivatable crosslinking and MD simulations to gain insights into the  
294 molecular architecture of the OmpC-MlaA complex. We have established that MlaA interacts  
295 extensively with OmpC at one of the dimeric interfaces of the porin trimer, and resides entirely  
296 within the OM lipid bilayer. We have also demonstrated that MlaA forms a hydrophilic channel,  
297 likely allowing PLs to translocate across the OM. This overall organization of the OmpC-MlaA  
298 complex is quite remarkable, especially how MlaA spans the OM and possibly gains access to  
299 outer leaflet PLs. Very few lipoproteins are known to span the OM; some notable examples  
300 include the LptDE and Wza translocons, which transports LPS and capsular polysaccharides,  
301 respectively. In the LptDE complex, the OM lipoprotein LptE serves as a plug, and stretches  
302 across the bilayer through the lumen of the LptD  $\beta$ -barrel (25, 26). In the octameric Wza  
303 translocon, each protomer provides a C-terminal  $\alpha$ -helix to form a pore that spans the membrane  
304 (27). MlaA is unique in that it is essentially an integral membrane protein, capable of forming a  
305 channel on its own. In many ways, MlaA behaves like typical OM  $\beta$ -barrel proteins, even though  
306 it is predominantly  $\alpha$ -helical. Furthermore, being overall a hydrophobic protein also poses a  
307 problem for MlaA to transit across the periplasmic space. How MlaA is shielded from the  
308 aqueous environment, in addition to the requirement of the Lol system (28), necessitates further  
309 investigation.

310 Very recently, crystal structures of MlaA in complex with trimeric porins have in fact  
311 been solved (29). Interestingly, the experimentally-determined structures of MlaA closely

312 resembled the initial MlaA model predicted from co-evolution analysis (Fig. S13A). These  
313 structures revealed that MlaA interacts with trimeric porins at one or more of their dimeric  
314 interfaces (Fig. S13B), in an orientation similar to one of our simulated OmpC-MlaA models  
315 (Fig. 3B). They also showed that MlaA contains a channel. Clearly, these findings converged  
316 with the main conclusions derived from our biochemical and modelling studies, which is quite  
317 remarkable. We note, however, a couple of discrepancies between the solved structures and our  
318 biochemical data, suggesting that these static structures may represent only one of several  
319 possible stable conformations of MlaA, which may exist as part of the mechanism associated  
320 with lipid transport in the native OM environment. First, the distance separating porin residues  
321 equivalent to Y149/L340 in OmpC and the MlaA<sub>F133-R205</sub> peptide (Fig. S13B) is not consistent  
322 with the detection of strong photoactivatable crosslinks between these regions in the complex  
323 (Fig. 2B). Second, the proposed location of some MlaA residues, specifically M39, F42, and  
324 N43, at the interior of the lipid bilayer (Fig. S13B) is not in agreement with high or partial  
325 solvent accessibility of these sites in cells, as highlighted in the SCAM data (Fig. S9B). Upon  
326 close examination of the structures, we found multiple non-native MlaA-MlaA and MlaA-porin  
327 contacts in all the crystal forms (Fig. S13C); these artificial crystal contacts, some with  
328 substantial buried surface areas, may have influenced the observed conformation of MlaA. Given  
329 that the MlaA-porin structures were also not solved in the context of a native lipid bilayer, we  
330 suspect that they do not yet provide the complete picture.

331 Our functional data on the OmpC-MlaA complex provide a glimpse of how PLs may  
332 translocate across the OM during maintenance of lipid asymmetry. One key aspect of MlaA  
333 function resides in a hairpin loop structure juxtaposed against the hydrophilic channel. Dynamics  
334 of this loop appear to control whether MlaA exists in a “closed” or “open” state, and thus access

335 of PLs through the channel. A mutation that likely rigidifies the loop locks MlaA in the non-  
336 functional “closed” state (Fig. 6), while mutations that possibly affect interactions with the loop  
337 favors the “open” state, and gives rise to gain of function (Fig. 5). Therefore, the hairpin loop  
338 may directly gate the channel, providing access for outer leaflet PLs across the OM. This idea  
339 has also been suggested based on the solved MlaA structures, where a putative disulfide bond  
340 that apparently locks the loop in position renders MlaA non-functional (29).

341 How OmpC participates in maintaining OM lipid asymmetry as part of the complex is not  
342 clear, especially given that MlaA alone provides a channel for PL translocation. It is possible that  
343 OmpC may play a passive role, and simply be important for stabilizing the structure and  
344 orientation of MlaA in the OM. However, we have previously shown that MlaA also interacts  
345 with OmpF, yet removing OmpF has minimal effects on OM lipid asymmetry (12); this argues  
346 against a mere passive role for OmpC in PL translocation. Furthermore, we have now identified  
347 a specific residue R92 on OmpC that is required for maintaining OM lipid asymmetry (Fig. 7).  
348 Therefore, we believe that OmpC plays an active role in the process. R92 lies in the dimeric  
349 interface of the OmpC trimer, which incidentally is where MlaA binds. Even though this residue  
350 has been shown to be important for gating the porin (30), it is not obvious how this gating  
351 function may influence the translocation of PLs by MlaA. Instead, we speculate that being close  
352 to Y149 and L340, R92 may somehow affect interactions between OmpC and the MlaA<sub>F133-R205</sub>  
353 peptide, possibly influencing MlaA conformation in the OM, and in turn, properties of the  
354 hydrophilic channel. The role that R92 plays in OmpC-MlaA function should be further  
355 characterized.

356 The OmpC-MlaA complex is proposed to extract PLs from the outer leaflet of the OM  
357 and hand them over to MlaC, which resides in the periplasm. Consistent with this idea, *E. coli*



358 MlaC has been crystallized with a bound PL, and shown to interact with a complex of OmpF-  
359 MlaA in vitro (14). However, it is not clear how transfer of PLs from OmpC-MlaA to MlaC  
360 takes place, even though this must presumably occur in an energy-independent fashion. Since PL  
361 movement from the outer to inner leaflets of the OM is entropically disfavored, it is likely that  
362 translocation of PLs by the OmpC-MlaA complex would be coupled to transfer to MlaC, i.e.  
363 extracted PLs do not go into the inner leaflet. If this were true, it may be possible that MlaC also  
364 influences the function of the OmpC-MlaA complex. Specifically, binding of MlaC to the  
365 complex may be required for PL extraction from the outer leaflet of the OM. MlaC could alter  
366 the structure and/or dynamics of MlaA in the OmpC-MlaA complex, ultimately leading to  
367 efficient PL translocation across the OM.

368 Lipid asymmetry is critical for the OM to function as an effective permeability barrier.  
369 Thus, understanding mechanistic aspects of how bacterial cells maintain OM lipid asymmetry  
370 would guide us in designing strategies to overcome the barrier. Our work on elucidating the  
371 architecture and function of the OmpC-MlaA complex has revealed critical insights into the role  
372 of a hairpin loop on MlaA in modulating activity, a feature that can be exploited in drug  
373 discovery efforts. In particular, small molecules that can potentially influence dynamics of this  
374 loop may induce either loss or gain of function, thereby leading to increased sensitivity to  
375 existing antibiotics.

376

377 **Experimental procedures**

378

379 **Bacterial strains and plasmids.** All strains and plasmids used are listed in Table S1 and S2,  
380 respectively.

381

382 **Growth conditions.** Luria Bertani (LB) broth and agar were prepared as described previously  
383 (12). Unless otherwise noted, ampicillin (Amp) (Sigma-Aldrich, MO, USA) was used at a  
384 concentration of 200 µg/mL, chloramphenicol (Cam) (Alfa Aesar, Heysham, UK) at 15 µg/mL,  
385 kanamycin (Kan) (Sigma-Aldrich) at 25 µg/mL, and spectinomycin (Spec) (Sigma-Aldrich) at 50  
386 µg/mL. For crosslinking experiments, *para*-Benzoyl-L-phenylalanine (*p*Bpa; Alfa Aesar) was  
387 dissolved in 1 M NaOH at 0.25 M, and used at 0.25 mM unless otherwise mentioned.

388

389 **Plasmid construction.** To construct most plasmids, the desired gene or DNA fragments were  
390 amplified by PCR from the DNA template using primers listed in Table S3. Amplified fragments  
391 were digested with relevant restriction enzymes (New England Biolabs) and ligated into the  
392 same sites of an appropriate plasmids using T4 DNA ligase (New England Biolabs). NovaBlue  
393 competent cells were transformed with the ligation products and selected on LB plates  
394 containing appropriate antibiotics. All constructs were verified by DNA sequencing (Axil  
395 Scientific, Singapore).

396

397 **Construction of chromosomal *ompC* mutants using negative selection.** All chromosomal  
398 *ompC* mutations were introduced via a positive-negative selection method described previously  
399 (31). To prepare electro-competent cells, strain MC4100 harbouring pKM208 (32) grown

400 overnight at 30 °C was inoculated into 15 mL SOB broth with 1:100 dilution. Cells were grown  
401 at the same temperature until OD<sub>600</sub> reached ~0.3-0.4. 1 mM of IPTG was added and the culture  
402 was grown for another 60 min at 30 °C. Cells were then subjected to heat shock at 42 °C for 15  
403 min, followed by incubation for 15 min on ice, with intermittent agitation. Subsequently, cells  
404 were centrifuged at 5000 x g for 10 min and made competent by washing twice with prechilled  
405 sterile water followed by cold 10 % glycerol. Competent cells were pelleted and resuspended in  
406 cold 10 % glycerol. For positive selection, 1 µg *kan-PrhaB-tse2* cassette amplified from pSLC-  
407 246 (31) using ompC\_NS\_N5 and ompC\_NS\_C3 primer pairs was transformed into the  
408 competent cells using 1-mm electroporation cuvettes (Biorad) in Eppendorf Eporator<sup>®</sup>  
409 (Eppendorf) with an output voltage of 1800 V. Cells were recovered in LB with 2 % glucose at  
410 37 °C for at least 4 h, plated onto LB plates supplemented with Kan and 2 % glucose, and  
411 incubated at 37 °C for 24 h. For negative selection, 1 µg PCR product of *ompC* wild-type or  
412 mutant constructs amplified using ompC\_NS\_N5\_C and ompC\_NS\_C3\_C primer pairs were  
413 transformed into competent cells made from positive selection using similar procedures. After  
414 transformation, cells were plated onto minimal (M9) plates supplemented with 0.2 % rhamnose,  
415 and incubated for 48 h at 37 °C. Surviving colonies were PCR screened and verified by DNA  
416 sequencing (Axil Scientific, Singapore).

417

418 **In vivo photoactivatable crosslinking.** We adopted previously described protocol (19) for all in  
419 vivo photoactivatable crosslinking experiments. Briefly, amber stop codon (TAG) was introduced  
420 at selected positions in either pDSW206*ompC* or pCDF*m1aA-His* plasmids via site directed  
421 mutagenesis using primers listed in Table S3. For *OmpC* crosslinking, MC4100 with  
422  $\Delta ompC::kan$  background harbouring p*Sup-BpaRS-6TRN* (33) and pDSW206*ompC* were used.

423 For MlaA crosslinking, MC4100 with  $\Delta mlaA::kan$  background harbouring *pSup-BpaRS-6TRN*  
424 (33) and *pCDFm1aA-His* were used. An overnight 5 mL culture was grown from a single colony  
425 in LB broth supplemented with appropriate antibiotics at 37 °C. Overnight cultures were diluted  
426 1:100 into 10 mL of the same media containing 0.25 mM *pBpa* and grown until  $OD_{600}$  reached  
427 ~1.0. Cells were normalized by optical density before pelleting and resuspended in 1 mL ice cold  
428 TBS (20 mM Tris pH 8.0, 150 mM NaCl). Samples were either used directly or irradiated with  
429 UV light at 365 nm for 20 min at 4 °C or room temperature. All samples were pelleted again and  
430 finally resuspended in 200  $\mu$ L of 2 X Laemmli buffer, boiled for 10 min, and centrifuged at  
431 21,000 x *g* in a microcentrifuge for one min at room temperature; 15  $\mu$ L of each sample  
432 subjected to SDS-PAGE and immunoblot analyses.

433  
434 **Over-expression and purification of OmpC-MlaA-His complexes.** All proteins were  
435 overexpressed in and purified from BL21( $\lambda$ DE3) derivatives. We found that BL21( $\lambda$ DE3) strains  
436 from multiple labs do not actually produce OmpC (gene is somehow missing in these strains);  
437 therefore, to obtain OmpC-MlaA complexes, we deleted *ompF* from the chromosome and  
438 introduced *ompC* on a plasmid. OmpC-MlaA-His protein complexes were over-expressed and  
439 purified from BL21( $\lambda$ DE3) cells with chromosomal  $\Delta ompF::kan$  background co-transformed  
440 with either *pDSW206ompC<sub>pBpa</sub>*, *pSup-BpaRS-6TRN* and *pCDFdmlaA-His* (for in vitro  
441 crosslinking experiments), or *pACYC184ompC* and *pET22b(+)**dmlaA-His* (for characterization  
442 of the wildtype complex). An overnight 10 mL culture was grown from a single colony in LB  
443 broth supplemented with appropriate antibiotics at 37 °C. The cell culture was then used to  
444 inoculate a 1-L culture and grown at the same temperature until  $OD_{600}$  reached ~ 0.6. For  
445 induction, 0.5 mM IPTG (Axil Scientific, Singapore) was added and the culture was grown for

446 another 3 h at 37 °C. Cells were pelleted by centrifugation at 4,700 x g for 20 min and then  
447 resuspended in 10-mL TBS containing 1 mM PMSF (Calbiochem) and 30 mM imidazole  
448 (Sigma-Aldrich). Cells were lysed with three rounds of sonication on ice (38 % power, 1 second  
449 pulse on, 1 second pulse off for 3 min). Cell lysates were incubated overnight with 1 % n-  
450 dodecyl  $\beta$ -D-maltoside (DDM, Calbiochem) at 4 °C. Cell debris was removed by centrifugation  
451 at 24,000 x g for 30 min at 4 °C. Subsequently, supernatant was incubated with 1 mL Ni-NTA  
452 nickel resin (QIAGEN), pre-equilibrated with 20 mL of wash buffer (TBS containing 0.025 %  
453 DDM and 80 mM imidazole) in a column for 1 h at 4 °C with rocking. The mixture was allowed  
454 to drain by gravity before washing vigorously with 10 x 10 mL of wash buffer and eluted with 10  
455 mL of elution buffer (TBS containing 0.025% DDM and 500 mM imidazole). The eluate was  
456 concentrated in an Amicon Ultra 100 kDa cut-off ultra-filtration device (Merck Millipore) by  
457 centrifugation at 4,000 x g to ~500  $\mu$ L. Proteins were further purified by SEC system (AKTA  
458 Pure, GE Healthcare, UK) at 4 °C on a prepacked Superdex 200 increase 10/300 GL column,  
459 using TBS containing 0.025% DDM as the eluent. Protein samples were used either directly or  
460 irradiated with UV at 365 nm for in vivo photoactivable crosslinking experiments.

461

#### 462 **SEC-MALS analysis to determine absolute molar masses of OmpC-MlaA-His complex.**

463 Prior to each SEC-MALS analysis, a preparative SEC was performed for BSA (Sigma-Aldrich)  
464 to separate monodisperse monomeric peak and to use as a quality control for the MALS  
465 detectors. In each experiment, monomeric BSA was injected before the protein of interest and  
466 the settings (calibration constant for TREOS detector, Wyatt Technology) that gave the well-  
467 characterized molar mass of BSA (66.4 kDa) were used for the molar mass calculation of the  
468 protein of interest. SEC purified OmpC-MlaA-His was concentrated to 5 mg/mL and injected

469 into Superdex 200 Increase 10/300 GL column pre-equilibrated with TBS and 0.025 % DDM.  
470 Light scattering (LS) and refractive index ( $n$ ) data were collected online using miniDAWN  
471 TREOS (Wyatt Technology, CA, USA) and Optilab T-rEX (Wyatt Technology, CA, USA),  
472 respectively, and analyzed by ASTRA 6.1.5.22 software (Wyatt Technology). Protein-conjugate  
473 analysis available in ASTRA software was applied to calculate non-proteinaceous part of the  
474 complex. In this analysis, the refractive index increment  $dn/dc$  values (where  $c$  is sample  
475 concentration) of 0.143 mL/g and 0.185 mL/g were used for DDM and protein complex,  
476 respectively (34). For BSA, UV extinction coefficient of 0.66 mL/(mg.cm) was used. For the  
477 OmpC-MlaA-His complex, that was calculated to be 1.66 mL/(mg.cm), based on its predicted  
478 stoichiometric ratio OmpC<sub>3</sub>MlaA.

479  
480 **Affinity purification experiments.** Affinity purification experiments were conducted using  
481  $\Delta mlaA$  strains expressing MlaA-His at low levels from the pET23/42 vector. For each strain, a  
482 1.5-L culture (inoculated from an overnight culture at 1:100 dilution) was grown in LB broth at  
483 37 °C until OD<sub>600</sub> of ~0.6. Cells were pelleted by centrifugation at 4700 x g for 20 min and then  
484 resuspended in 10-mL TBS containing 1 mM PMSF (Calbiochem) and 50 mM imidazole  
485 (Sigma-Aldrich). Cells were lysed with three rounds of sonication on ice (38 % power, 1 second  
486 pulse on, 1 second pulse off for 3 min). Cell lysates were incubated overnight with 1 % n-  
487 dodecyl  $\beta$ -D-maltoside (DDM, Calbiochem) at 4 °C. Cell debris was removed by centrifugation  
488 at 24,000 x g for 30 min at 4 °C. Subsequently, supernatant was incubated with 1 mL Ni-NTA  
489 nickel resin (QIAGEN), pre-equilibrated with 20 mL of wash buffer (TBS containing 0.025%  
490 DDM and 80 mM imidazole) in a column for 1 h at 4 °C with rocking. The mixture was allowed  
491 to drain by gravity before washing vigorously with 10 x 10 mL of wash buffer and eluted with 5

492 mL of elution buffer (TBS containing 0.025% DDM and 500 mM imidazole). The eluate was  
493 concentrated in an Amicon Ultra 100 kDa cut-off ultra-filtration device (Merck Millipore) by  
494 centrifugation at 4,000 x g to ~100  $\mu$ L. The concentrated sample was mixed with equal amounts  
495 of 2X Laemmli buffer, boiled at 100 °C for 10 min, and subjected to SDS-PAGE and  
496 immunoblot analyses.

497  
498 **Trypsin digestion for protein N-terminal sequencing and mass spectrometry analyses.** A 1  
499 mg/mL solution of purified OmpC-MlaA-His (OmpC was either wild-type or substituted with  
500 *p*Bpa at selected positions) complex was incubated with or without 50  $\mu$ g/mL trypsin (Sigma-  
501 Aldrich) for 1 h at room temperature. *p*Bpa substituted samples were irradiated with UV at 365  
502 nm before trypsin digestion. Samples were then analyzed by SDS-PAGE, followed by SEC. Peak  
503 fractions from SEC for each sample were pooled, concentrated using an Amicon Ultra 100 kDa  
504 cut-off ultra-filtration device (Merck Millipore), and resuspended in 2 X Laemmli sample buffer  
505 before analyses by SDS-PAGE and immunoblot using  $\alpha$ -MlaA antibody. For N-terminal  
506 sequencing, samples were transferred onto PVDF membrane, followed by Coomassie Blue  
507 staining (1–2 s). The desired protein bands were carefully excised with a surgical scalpel. For  
508 tandem MS, protein bands were excised from a Coomassie Blue stained Tricine gel. Samples  
509 prepared for N-terminal sequencing and tandem MS were kept in sterile 1.5 mL centrifuge tubes  
510 before submission for analyses at Tufts University Core Facility, Boston, USA, and Taplin  
511 Biological Mass Spectrometry Facility, Harvard Medical School, Boston, USA, respectively.

512  
513 **Substituted cysteine accessibility method (SCAM).** 1-mL cells were grown to exponential  
514 phase ( $OD_{600}$  ~0.6), washed twice with TBS (pH 8.0), and resuspended in 480  $\mu$ L of TBS. For

515 the blocking step, four tubes containing 120  $\mu$ L of cell suspension were either untreated (positive  
516 and negative control tubes added with deionized H<sub>2</sub>O) or treated with 5 mM thiol-reactive  
517 reagent *N*-ethylmaleimide (NEM, Thermo Scientific) or sodium (2-sulfonatoethyl)  
518 methanethiosulfonate (MTSES, Biotium). As MTSES is membrane impermeable, it is expected  
519 to react with the free cysteine in MlaA variants only when the residue near or at the membrane-  
520 water boundaries, or in a hydrophilic channel. In contrast, NEM is expected to label all MlaA  
521 cysteine variants as it is membrane permeable. Reaction with MTSES or NEM blocks the  
522 particular cysteine site from subsequently labelling by maleimide-polyethylene glycol (Mal-  
523 PEG; 5 kDa, Sigma-Aldrich). After agitation at room temperature for 1 h, cells were washed  
524 twice with TBS, pelleted at 16,000  $\times$  *g*, and resuspended in 100  $\mu$ L of lysis buffer (10 M urea,  
525 1% SDS, 2 mM EDTA in 1 M Tris pH 6.8). Both NEM- and MTSES-blocked samples and the  
526 positive control sample were exposed to 1.2 mM Mal-PEG-5k. After agitation for another hour  
527 with protection from light, all samples were added with 120  $\mu$ L of 2 X Laemmli buffer, boiled  
528 for 10 min, and centrifuged at 21,000  $\times$  *g* in a microcentrifuge for one min at room temperature;  
529 20  $\mu$ L from each sample tubes were subjected to SDS-PAGE and immunoblot analyses.

530

531 **In vivo disulfide bond analysis.** Strain NR1216 ( $\Delta dsbA$ ) harbouring pET23/42*mLaA-His*  
532 expressing MlaA-His with site specific cysteine substitutions was grown overnight in LB broth  
533 at 37 °C. A 0.5 mL of overnight culture was normalized by optical density, added with  
534 trichloroacetic acid (TCA) at final concentration of ~14 % and mixed thoroughly at 4 °C. This  
535 step was performed to prevent scrambling of disulfide bond formed in the cysteines substituted  
536 MlaA-His. Proteins precipitated for at least 30 min on ice were centrifuged at 16,000  $\times$  *g* for 10  
537 min at 4 °C. The pellet was washed with 1 mL of ice-cold acetone and centrifuged again at



538 16,000 × *g* for 10 min at 4 °C. Supernatants were then aspirated and the pellet was air dried at  
539 room temperature for at least 20 min. Samples were resuspended thoroughly with 100 μL of  
540 either 100 mM Tris.HCl pH 8.0, 1% SDS (for non-reduced samples), or the same buffer  
541 supplemented with 100 mM of dithiothreitol (DTT) (for reduced samples), incubated for 20 min  
542 at room temperature. The samples were finally mixed with 4 X Laemmli buffer, boiled for 10  
543 min and subjected to SDS-PAGE and immunoblotting analyses using α-His antibody.

544 **Docking of MlaA to OmpC.** The ClusPro server (22) was used to dock MlaA (ligand, uniprot  
545 ID: P76506, [https://gremlin2.bakerlab.org/meta\\_struct.php?page=p76506](https://gremlin2.bakerlab.org/meta_struct.php?page=p76506)) (17) to OmpC  
546 (receptor, PDB ID: 2J1N) (18). The default server settings were used in the docking procedure.  
547 The minimum distance between 6 residues on OmpC and the corresponding cross-linked peptide  
548 regions of MlaA was calculated for all the predicted structures obtained from the server. Two  
549 OmpC-MlaA model with the smallest average minimum distance of all residue and peptide pairs  
550 were selected as the initial structures for use in the all-atom simulations.

551

552 **Simulation procedures and setup.** All simulations were performed using version 5.1.4 of the  
553 GROMACS simulation package (35, 36).

554

555 *All-atom simulations.* In total, 7 all-atom simulations were performed (Table A). The simulations  
556 were performed using the CHARMM36 force field parameter set (37). The equations of motion  
557 were integrated using the Verlet leapfrog algorithm with a step size of 2 fs. Lengths of hydrogen  
558 bonds were constrained with the LINCS algorithm (38). Electrostatic interactions were treated  
559 using the smooth Particle Mesh Ewald (PME) method (39), with cutoff for short-range  
560 interactions of 1.2 nm. The van der Waals interactions were switched smoothly to zero between

561 1.0 and 1.2 nm. The neighbor list was updated every 20 steps. The Nose-Hoover thermostat (40,  
 562 41) with a coupling constant of 1.0 ps was used to maintain a constant system temperature of 313  
 563 K. The protein, membrane and solvent (water and ions) were coupled to separate thermostats.  
 564 The Parrinello-Rahman barostat (42) with a coupling constant of 5.0 ps was used to maintain a  
 565 pressure of 1 bar. Semi-isotropic pressure coupling was used for all the membrane systems,  
 566 while isotropic coupling was used for the solvent-only system. Initial velocities were set  
 567 according to the Maxwell distribution.

568 Proteins were inserted into a pre-equilibrated, symmetrical 1,2-dimyristoyl-  
 569 phosphatidylethanolamine (DMPE) membrane over 5 ns using the membed tool (43) in the  
 570 GROMACS simulation package. Subsequent equilibration, with position restraints of 1000 kJ  
 571 mol<sup>-1</sup> placed on all non-hydrogen protein atoms, was performed for 20 ns to allow the solvent  
 572 and lipids to equilibrate around the proteins. The position restraints were removed before  
 573 performing the production runs.

574 Table A. Summary of all-atom molecular simulations: system compositions and simulation times

| Protein Configuration                                   | Lipids      | Water and Ions                                                       | Simulation time (# of simulations x ns) |
|---------------------------------------------------------|-------------|----------------------------------------------------------------------|-----------------------------------------|
| MlaA                                                    | N/A         | 9439 H <sub>2</sub> O<br>29 K <sup>+</sup><br>19 Cl <sup>-</sup>     | 1 x 500                                 |
| MlaA                                                    | 272<br>DMPE | 11734<br>H <sub>2</sub> O<br>42 K <sup>+</sup><br>32 Cl <sup>-</sup> | 1 x 500                                 |
| OmpC trimer<br>MlaA (ClusPro model) in<br>orientation 1 | 980<br>DMPE | 36113<br>H <sub>2</sub> O<br>98 K <sup>+</sup><br>98 Cl <sup>-</sup> | 1 x 500<br>1 x 320<br>1 x 130           |
| OmpC trimer<br>MlaA (ClusPro model) in<br>orientation 2 | 980<br>DMPE | 36113<br>H <sub>2</sub> O<br>98 K <sup>+</sup><br>98 Cl <sup>-</sup> | 1 x 500<br>1 x 500                      |

575

576 All of the simulations performed are summarized in Table A. For the OmpC trimer docked with  
577 MlaA in orientation 1, three separate production simulations with different initial velocities were  
578 performed for the OmpC-MlaA complex, resulting in 3 trajectories of 500 ns, 320 ns, and 130 ns  
579 in length, respectively. For the OmpC trimer docked with MlaA in orientation 2, two separate  
580 production simulations with different initial velocities were performed for the complex, resulting  
581 in 2 trajectories of 500 ns in length. Clustering was performed on the MlaA structures obtained  
582 from a combined trajectory of all three (MlaA orientation 1) or two (MlaA orientation 2)  
583 atomistic simulations – a total of 4750 frames spaced every 0.2 ns. The structures were assigned  
584 to clusters using Root Mean Squared Distance (RMSD) with a 0.1 nm cut-off. Four and two  
585 clusters, respectively, were observed for MlaA in the two orientations to contain greater than 100  
586 frames. The central structure of these four clusters was used to generate the representative  
587 OmpC-MlaA models (Fig. S7). `trj_cavity` was used to identify the location the pore cavity (44),  
588 and `Hole` was used to create the pore profile (45).

589

590 **Temperature titration for chromosomal *ompC* mutants.** Purified wild-type and mutant  
591 OmpC-MlaA-His complexes were aliquoted into 1.5 mL centrifuge tubes and incubated in water  
592 bath set at different temperatures for 10 min. 20  $\mu$ l of each sample were transferred into separate  
593 tubes and mixed immediately with equal volume of 2 X Laemmli buffer and subjected to SDS-  
594 PAGE in 12 % Tris.HCl gels, followed by Coomassie Blue staining (Sigma-Aldrich).

595

596 **LPS labeling and lipid A isolation.** Mild acid hydrolysis of [ $^{32}$ P]-labeled cultures was used to  
597 isolate lipid A according to a procedure described previously (4, 12, 52) with some  
598 modifications. 5 mL cultures were grown (inoculated with overnight cultures at 1:100 dilution)

599 in LB broth at 37 °C until OD<sub>600</sub> reached ~0.5–0.7 (exponential) or ~2–4 (stationary). Cultures  
600 were uniformly labeled with 1 μCi mL<sup>-1</sup> [<sup>32</sup>P]-disodium phosphate (Perkin-Elmer) from the start  
601 of inoculation. One MC4100 wild-type culture labeled with [<sup>32</sup>P] was treated with  
602 25 mM EDTA, pH 8.0 for 10 min prior to harvesting. Cells (5 mL and 1 mL for exponential and  
603 stationary phase cultures respectively) were harvested by centrifugation at 4700 × g for 10 min  
604 and washed twice with 1 mL PBS (137 mM NaCl, 2.7 mM KCl, 10 mM Na<sub>2</sub>HPO<sub>4</sub>,  
605 1.8 mM KH<sub>2</sub>PO<sub>4</sub>, pH 7.4) at 5000 × g for 10 min. Each cell pellet was resuspended in 0.32 mL  
606 PBS, and converted into single phase Bligh/Dyer mixture (chloroform/methanol/water:1/2/0.8)  
607 by adding 0.8 mL methanol and 0.4 mL chloroform. The single phase Bligh/Dyer mixture was  
608 incubated at room temperature for 20 min, followed by centrifugation at 21,000 × g for 30 min.  
609 Each pellet obtained was washed once with 1 mL freshly made single phase Bligh/Dyer mixture  
610 and centrifuged as above. The pellet was later resuspended in 0.45 mL 12.5 mM sodium acetate  
611 containing 1 % SDS, pH 4.5. The mixture was sonicated for 15 min before incubation at 100 °C  
612 for 40 min. The mixture was converted to a two-phase Bligh/Dyer mixture  
613 (chloroform/methanol/water: 2/2/1.8) by adding 0.50 mL methanol and 0.50 mL chloroform. The  
614 lower phase of each mixture was collected after phase partitioning by centrifugation at  
615 21 000 × g for 30 min. The collected lower phase was washed once with 1 mL of the upper phase  
616 derived from the freshly made two-phase Bligh/Dyer mixture and centrifuged as above. The final  
617 lower phase was collected after phase partitioning by centrifugation and dried under N<sub>2</sub> gas. The  
618 dried radiolabeled lipid A samples were redissolved in 100 μL of chloroform/methanol mixture  
619 (4/1), and 20 μL of the samples were used for scintillation counting (MicroBeta2®, Perkin-  
620 Elmer). Equal amounts of radiolabeled lipids (cpm/lane) were spotted onto the TLC plate (Silica  
621 Gel 60 F254, Merck Millipore) and were separated using the solvent system consisting of

622 chloroform/pyridine/96 % formic acid/water (50/50/14.6/4.6) (5). The TLC plate was then dried  
623 and exposed to phosphor storage screens (GE Healthcare). Phosphor-screens were visualized in a  
624 phosphor-imager (Storm 860, GE Healthcare), and the spots were analyzed by ImageQuant TL  
625 analysis software (version 7.0, GE Healthcare). Spots were quantified and averaged based on  
626 three independent experiments of lipid A isolation.

627  
628 **OM permeability studies.** OM sensitivity against SDS/EDTA was judged by colony-forming-  
629 unit (CFU) analyses on LB agar plates containing indicated concentrations of SDS/EDTA.  
630 Briefly, 5 mL cultures were grown (inoculated with overnight cultures at 1:100 dilution) in LB  
631 broth at 37 °C until OD<sub>600</sub> reached ~0.4-0.6. Cells were normalized by optical density, first  
632 diluted to OD<sub>600</sub> = 0.1 (~10<sup>8</sup> cells), and then serially diluted (ten-fold) in LB broth using 96-well  
633 microtiter plates. 2.5 µL of the diluted cultures were manually spotted onto the plates, dried, and  
634 incubated overnight at 37 °C. Plate images were visualized by *G:Box Chemi-XT4* (Genesys  
635 version 1.4.3.0, Syngene).

636  
637 **SDS-PAGE, immunoblotting and staining.** All samples subjected to SDS-PAGE were mixed  
638 1:1 with 2X Laemmli buffer. Except for temperature titration experiments, the samples were  
639 subsequently either kept at room temperature or subjected to boiling at 100 °C for 10 min. Equal  
640 volumes of the samples were loaded onto the gels. As indicated in the figure legends, SDS-  
641 PAGE was performed using either 12% or 15% Tris.HCl gels (53) or 15% Tricine gel (54) at 200  
642 V for 50 min. After SDS-PAGE, gels were visualized by either Coomassie Blue staining, or  
643 subjected to immunoblot analysis. Immunoblot analysis was performed by transferring protein  
644 bands from the gels onto polyvinylidene fluoride (PVDF) membranes (Immun-Blot 0.2 µm, Bio-

645 Rad, CA, USA) using semi-dry electroblotting system (Trans-Blot Turbo Transfer System, Bio-  
646 Rad). Membranes were blocked for 1 h at room temperature by 1 X casein blocking buffer  
647 (Sigma-Aldrich), washed and incubated with either primary antibodies (monoclonal  $\alpha$ -MlaA (12)  
648 (1:3000) and  $\alpha$ -OmpC (31) (1:1500)) or monoclonal  $\alpha$ -His antibody (pentahistidine) conjugated  
649 to the horseradish peroxidase (HRP) (Qiagen, Hilden, Germany) at 1:5000 dilution for 1 – 3 h at  
650 room temperature. Secondary antibody ECL™ anti-mouse IgG-HRP was used at 1:5000  
651 dilution. Luminata Forte Western HRP Substrate (Merck Millipore) was used to develop the  
652 membranes, and chemiluminescence signals were visualized by G:Box Chemi-Xt4 (Genesys  
653 version 1.4.3.0, Syngene).

654

656 **Acknowledgements.** We thank Swaine Chen and Varnica Khetrpal (Genome Institute of  
657 Singapore, A\*STAR) for providing  $\alpha$ -OmpC antibody, and reagents for negative selection and  
658 assistance in this technique. We also thank Michael Berne (Analytical Core Facility, Tufts  
659 Medical School) and Ross Tomaino (Taplin Mass Spectrometry Facility, Harvard Medical  
660 School) for performing Edman sequencing and MS/MS, respectively. We gratefully  
661 acknowledge computing resources provided by the National Supercomputing Center Singapore  
662 (<http://www.nsc.sg>). Finally, we thank Swaine Chen for critical discussions and comments on  
663 the manuscript. J.Y. was supported by the National University of Singapore Graduate School for  
664 Integrative Sciences and Engineering scholarship. J.K.M. and P.J.B. acknowledge support from  
665 the Singapore Ministry of Education Academic Research Fund Tier 3 grant (MOE2012-T3-1-  
666 008). All experimental work was supported by the National University of Singapore Start-up  
667 funding, the Singapore Ministry of Education Academic Research Fund Tier 1 and Tier 2  
668 (MOE2013-T2-1-148) grants (to S.-S.C.).

669  
670 **Conflict of Interest.** The authors declare that they have no conflicts of interest with the contents  
671 of this article.

672  
673 **Author contributions:** J.Y., K.W.T., D.A.H., P.J.B. and S.-S.C designed research; J.Y., K.W.T.,  
674 Z.-S.C. performed all wet lab experiments described in this work; D.A.H. and J.K.M. performed  
675 all MD simulations; J.Y., K.W.T., D.A.H., P.J.B. and S.-S.C. analyzed and discussed data; J.Y.,  
676 K.W.T., and S.-S.C. wrote the paper.

677

678

679 **References**

- 680 1. Kamio Y, Nikaido H. Outer membrane of *Salmonella typhimurium*: accessibility of  
681 phospholipid head groups to phospholipase c and cyanogen bromide activated dextran in the  
682 external medium. *Biochemistry*. 1976;15(12):2561-70.
- 683 2. Funahara Y, Nikaido H. Asymmetric localization of lipopolysaccharides on the outer  
684 membrane of *Salmonella typhimurium*. *J Bacteriol*. 1980;141(3):1463-5.
- 685 3. Nikaido H. Molecular basis of bacterial outer membrane permeability revisited.  
686 *Microbiol Mol Biol Rev*. 2003;67(4):593-656.
- 687 4. Jia W, El Zoeiby A, Petruzzello TN, Jayabalasingham B, Seyedirashti S, Bishop RE.  
688 Lipid trafficking controls endotoxin acylation in outer membranes of *Escherichia coli*. *J Biol*  
689 *Chem*. 2004;279(43):44966-75.
- 690 5. Wu T, McCandlish AC, Gronenberg LS, Chng SS, Silhavy TJ, Kahne D. Identification of  
691 a protein complex that assembles lipopolysaccharide in the outer membrane of *Escherichia coli*.  
692 *Proc Natl Acad Sci U S A*. 2006;103(31):11754-9.
- 693 6. Okuda S, Sherman DJ, Silhavy TJ, Ruiz N, Kahne D. Lipopolysaccharide transport and  
694 assembly at the outer membrane: the PEZ model. *Nat Rev Microbiol*. 2016;14(6):337-45.
- 695 7. Shrivastava R, Jiang X, Chng SS. Outer membrane lipid homeostasis via retrograde  
696 phospholipid transport in *Escherichia coli*. *Mol Microbiol*. 2017.
- 697 8. Dekker N. Outer-membrane phospholipase A: known structure, unknown biological  
698 function. *Mol Microbiol*. 2000;35(4):711-7.
- 699 9. Bishop RE. The lipid A palmitoyltransferase PagP: molecular mechanisms and role in  
700 bacterial pathogenesis. *Mol Microbiol*. 2005;57(4):900-12.



- 701 10. Dalebroux ZD, Matamouros S, Whittington D, Bishop RE, Miller SI. PhoPQ regulates  
702 acidic glycerophospholipid content of the Salmonella Typhimurium outer membrane. Proc Natl  
703 Acad Sci U S A. 2014;111(5):1963-8.
- 704 11. Malinverni JC, Silhavy TJ. An ABC transport system that maintains lipid asymmetry in  
705 the gram-negative outer membrane. Proc Natl Acad Sci U S A. 2009;106(19):8009-14.
- 706 12. Chong ZS, Woo WF, Chng SS. Osmoporin OmpC forms a complex with MlaA to  
707 maintain outer membrane lipid asymmetry in Escherichia coli. Mol Microbiol. 2015;98(6):1133-  
708 46.
- 709 13. Huang YM, Miao Y, Munguia J, Lin L, Nizet V, McCammon JA. Molecular dynamic  
710 study of MlaC protein in Gram-negative bacteria: conformational flexibility, solvent effect and  
711 protein-phospholipid binding. Protein Sci. 2016;25(8):1430-7.
- 712 14. Ekiert DC, Bhabha G, Isom GL, Greenan G, Ovchinnikov S, Henderson IR, et al.  
713 Architectures of Lipid Transport Systems for the Bacterial Outer Membrane. Cell.  
714 2017;169(2):273-85 e17.
- 715 15. Thong S, Ercan B, Torta F, Fong ZY, Wong HY, Wenk MR, et al. Defining key roles for  
716 auxiliary proteins in an ABC transporter that maintains bacterial outer membrane lipid  
717 asymmetry. Elife. 2016;5.
- 718 16. Pages JM, James CE, Winterhalter M. The porin and the permeating antibiotic: a  
719 selective diffusion barrier in Gram-negative bacteria. Nat Rev Microbiol. 2008;6(12):893-903.
- 720 17. Ovchinnikov S, Park H, Varghese N, Huang PS, Pavlopoulos GA, Kim DE, et al. Protein  
721 structure determination using metagenome sequence data. Science. 2017;355(6322):294-8.
- 722 18. Basle A, Rummel G, Storicci P, Rosenbusch JP, Schirmer T. Crystal structure of  
723 osmoporin OmpC from E. coli at 2.0 Å. J Mol Biol. 2006;362(5):933-42.

- 724 19. Chin JW, Martin AB, King DS, Wang L, Schultz PG. Addition of a photocrosslinking  
725 amino acid to the genetic code of *Escherichiacoli*. *Proc Natl Acad Sci U S A*.  
726 2002;99(17):11020-4.
- 727 20. Nakamura K, Mizushima S. Effects of heating in dodecyl sulfate solution on the  
728 conformation and electrophoretic mobility of isolated major outer membrane proteins from  
729 *Escherichia coli* K-12. *J Biochem*. 1976;80(6):1411-22.
- 730 21. Tamm LK, Hong H, Liang B. Folding and assembly of beta-barrel membrane proteins.  
731 *Biochim Biophys Acta*. 2004;1666(1-2):250-63.
- 732 22. Kozakov D, Hall DR, Xia B, Porter KA, Padhorny D, Yueh C, et al. The ClusPro web  
733 server for protein-protein docking. *Nat Protoc*. 2017;12(2):255-78.
- 734 23. Sutterlin HA, Shi H, May KL, Miguel A, Khare S, Huang KC, et al. Disruption of lipid  
735 homeostasis in the Gram-negative cell envelope activates a novel cell death pathway. *Proc Natl*  
736 *Acad Sci U S A*. 2016;113(11):E1565-74.
- 737 24. Naveed H, Jimenez-Morales D, Tian J, Pasupuleti V, Kenney LJ, Liang J. Engineered  
738 oligomerization state of OmpF protein through computational design decouples oligomer  
739 dissociation from unfolding. *J Mol Biol*. 2012;419(1-2):89-101.
- 740 25. Dong H, Xiang Q, Gu Y, Wang Z, Paterson NG, Stansfeld PJ, et al. Structural basis for  
741 outer membrane lipopolysaccharide insertion. *Nature*. 2014;511(7507):52-6.
- 742 26. Qiao S, Luo Q, Zhao Y, Zhang XC, Huang Y. Structural basis for lipopolysaccharide  
743 insertion in the bacterial outer membrane. *Nature*. 2014;511(7507):108-11.
- 744 27. Dong C, Beis K, Nesper J, Brunkan-Lamontagne AL, Clarke BR, Whitfield C, et al. Wza  
745 the translocon for *E. coli* capsular polysaccharides defines a new class of membrane protein.  
746 *Nature*. 2006;444(7116):226-9.

- 747 28. Okuda S, Tokuda H. Lipoprotein sorting in bacteria. *Annu Rev Microbiol.* 2011;65:239-  
748 59.
- 749 29. Abellon-Ruiz J, Kaptan SS, Basle A, Claudi B, Bumann D, Kleinekathofer U, et al.  
750 Structural basis for maintenance of bacterial outer membrane lipid asymmetry. *Nat Microbiol.*  
751 2017;2(12):1616-23.
- 752 30. Liu N, Delcour AH. The spontaneous gating activity of OmpC porin is affected by  
753 mutations of a putative hydrogen bond network or of a salt bridge between the L3 loop and the  
754 barrel. *Protein Eng.* 1998;11(9):797-802.
- 755 31. Khetrpal V, Mehershahi K, Rafee S, Chen S, Lim CL, Chen SL. A set of powerful  
756 negative selection systems for unmodified Enterobacteriaceae. *Nucleic Acids Res.*  
757 2015;43(13):e83.
- 758 32. Murphy KC, Campellone KG. Lambda Red-mediated recombinogenic engineering of  
759 enterohemorrhagic and enteropathogenic *E. coli*. *BMC Mol Biol.* 2003;4:11.
- 760 33. Ryu Y, Schultz PG. Efficient incorporation of unnatural amino acids into proteins in  
761 *Escherichia coli*. *Nat Methods.* 2006;3(4):263-5.
- 762 34. Slotboom DJ, Duurkens RH, Olieman K, Erkens GB. Static light scattering to  
763 characterize membrane proteins in detergent solution. *Methods.* 2008;46(2):73-82.
- 764 35. Berendsen HJC vdSD, van Drunen R GROMACS: A message-passing parallel molecular  
765 dynamics implementation. *Comput Phys Commun* 1995;91(1-3):43-56.
- 766 36. Van Der Spoel D, Lindahl E, Hess B, Groenhof G, Mark AE, Berendsen HJ.  
767 GROMACS: fast, flexible, and free. *J Comput Chem.* 2005;26(16):1701-18.

- 768 37. Best RB, Zhu X, Shim J, Lopes PE, Mittal J, Feig M, et al. Optimization of the additive  
769 CHARMM all-atom protein force field targeting improved sampling of the backbone phi, psi and  
770 side-chain chi(1) and chi(2) dihedral angles. *J Chem Theory Comput.* 2012;8(9):3257-73.
- 771 38. Hess B BH, Berendsen HJC, Fraaije JGEM LINCS: A linear constraint solver for  
772 molecular simulations. *J Comput Chem* 1997;18(12):8577-93.
- 773 39. Essmann U, Perera L, Berkowitz ML, Darden T, Lee H, Pedersen LG. A smooth particle  
774 mesh Ewald method. *The Journal of Chemical Physics.* 1995;103(19):8577-93.
- 775 40. Nosé S. A molecular dynamics method for simulations in the canonical ensemble.  
776 *Molecular Physics.* 2002;100(1):191-8.
- 777 41. Hoover WG. Canonical dynamics: Equilibrium phase-space distributions. *Phys Rev A*  
778 *Gen Phys.* 1985;31(3):1695-7.
- 779 42. Nosé S, Klein ML. Constant pressure molecular dynamics for molecular systems.  
780 *Molecular Physics.* 2006;50(5):1055-76.
- 781 43. Wolf MG, Hoefling M, Aponte-Santamaria C, Grubmuller H, Groenhof G. g\_membed:  
782 Efficient insertion of a membrane protein into an equilibrated lipid bilayer with minimal  
783 perturbation. *J Comput Chem.* 2010;31(11):2169-74.
- 784 44. Paramo T, East A, Garzon D, Ulmschneider MB, Bond PJ. Efficient Characterization of  
785 Protein Cavities within Molecular Simulation Trajectories: trj\_cavity. *J Chem Theory Comput.*  
786 2014;10(5):2151-64.
- 787 45. Smart OS, Goodfellow JM, Wallace BA. The pore dimensions of gramicidin A. *Biophys*  
788 *J.* 1993;65(6):2455-60.

- 789 46. Monticelli L, Kandasamy SK, Periolo X, Larson RG, Tieleman DP, Marrink SJ. The  
790 MARTINI Coarse-Grained Force Field: Extension to Proteins. *J Chem Theory Comput.*  
791 2008;4(5):819-34.
- 792 47. Marrink SJ, Risselada HJ, Yefimov S, Tieleman DP, de Vries AH. The MARTINI force  
793 field: coarse grained model for biomolecular simulations. *J Phys Chem B.* 2007;111(27):7812-  
794 24.
- 795 48. Tironi IG, Sperb R, Smith PE, van Gunsteren WF. A generalized reaction field method  
796 for molecular dynamics simulations. *The Journal of Chemical Physics.* 1995;102(13):5451-9.
- 797 49. Bussi G, Donadio D, Parrinello M. Canonical sampling through velocity rescaling. *J*  
798 *Chem Phys.* 2007;126(1):014101.
- 799 50. Berendsen HJC, Postma JPM, van Gunsteren WF, DiNola A, Haak JR. Molecular  
800 dynamics with coupling to an external bath. *The Journal of Chemical Physics.* 1984;81(8):3684-  
801 90.
- 802 51. Wassenaar TA, Pluhackova K, Bockmann RA, Marrink SJ, Tieleman DP. Going  
803 Backward: A Flexible Geometric Approach to Reverse Transformation from Coarse Grained to  
804 Atomistic Models. *J Chem Theory Comput.* 2014;10(2):676-90.
- 805 52. Zhou Z, Lin S, Cotter RJ, Raetz CR. Lipid A modifications characteristic of *Salmonella*  
806 *typhimurium* are induced by NH<sub>4</sub>VO<sub>3</sub> in *Escherichia coli* K12. Detection of 4-amino-4-deoxy-  
807 L-arabinose, phosphoethanolamine and palmitate. *J Biol Chem.* 1999;274(26):18503-14.
- 808 53. Laemmli UK. Cleavage of structural proteins during the assembly of the head of  
809 bacteriophage T4. *Nature.* 1970;227(5259):680-5.
- 810 54. Schagger H. Tricine-SDS-PAGE. *Nat Protoc.* 2006;1(1):16-22.

811

812 **Figures**

813

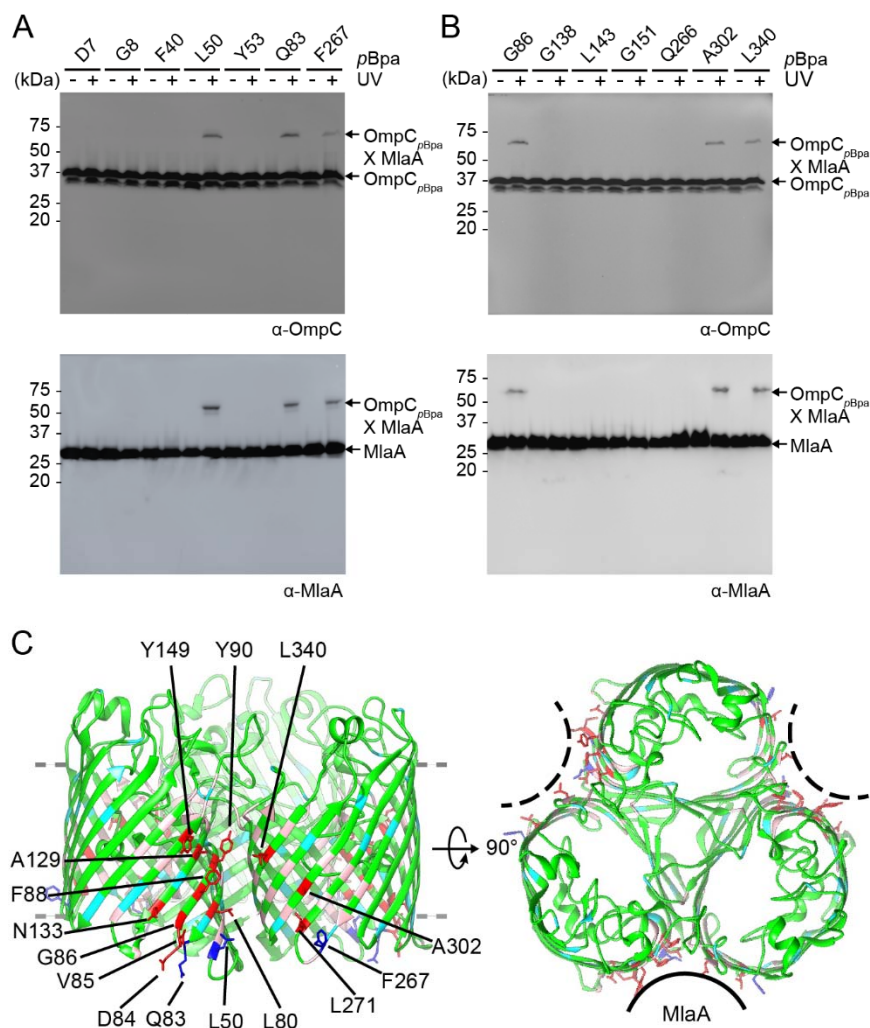

814

815 **Figure 1.** MlaA binds at the dimeric interfaces of the OmpC trimer in vivo. (A, B)

816 Representative immunoblots showing UV-dependent formation of crosslinks between OmpC and

817 MlaA in  $\Delta ompC$  cells expressing OmpC substituted with *pBpa* at indicated positions, selected in

818 a (A) global, or (B) localized search. (C) Side (left) and top (right) views of cartoon

819 representations of the crystal structure of *E. coli* OmpC (PDB ID: 2J1N) (18) with positions that

820 crosslink to MlaA highlighted. Residues selected in the global search for MlaA interaction are

821 colored *cyan* (no crosslinks) and *blue* (sticks; crosslinks detected), while those selected in the

822 localized search are colored *light pink* (no crosslinks) and *red* (sticks; crosslinks detected). The  
823 OM boundary is indicated as gray dashed lines. MlaA binding sites are indicated as solid or  
824 dashed curves on the top-view representation.

825

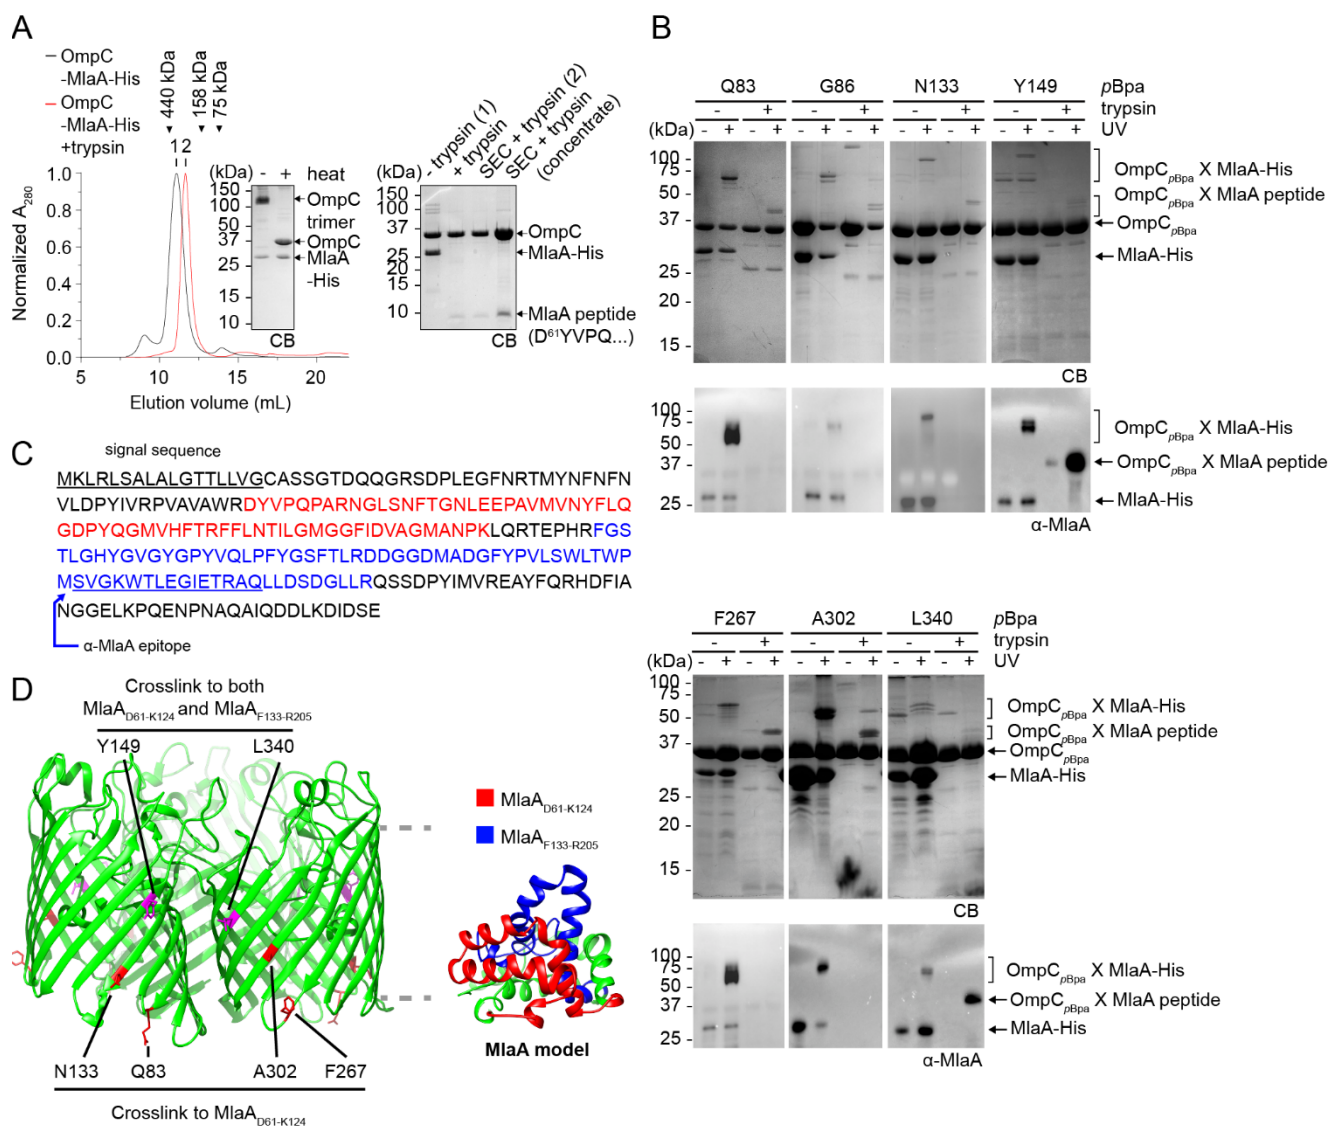

826

827 **Figure 2.** OmpC contacts two specific regions on MlaA. (A) SEC profiles and SDS-PAGE  
828 analyses of purified OmpC-MlaA-His complex before (*black*) or after (*red*) treatment with  
829 trypsin. Peak fractions from SEC were subjected to denaturing SDS-PAGE (15% Tris.HCl gel),  
830 followed by Coomassie Blue (CB) staining (*right*). Non-trypsin treated samples were also  
831 analysed by seminitive SDS-PAGE (*left*). Edman degradation and tandem MS analyses revealed  
832 that the MlaA peptide that remains bound to OmpC following trypsin treatment begins at D61  
833 (Fig. S3). (B) SDS-PAGE (15% Tris.HCl gel) and immunoblot analyses of purified OmpC <sub>$\rho$ Bpa</sub>-



834 MlaA-His complexes following sequential UV irradiation and trypsin digestion. The resulting  
835 OmpC<sub>pBpa</sub>-MlaA<sub>peptide</sub> crosslinked products were N-terminally sequenced (see Fig. S3). (C)  
836 Amino acid sequence of MlaA with the two peptides found crosslinked to OmpC<sub>pBpa</sub> highlighted  
837 (*red*: MlaA<sub>D61-K124</sub>, *blue*: MlaA<sub>F133-R205</sub>). The signal sequence and  $\alpha$ -MlaA binding epitope are  
838 underlined and annotated. (D) Cartoon representations of the crystal structure of *E. coli* OmpC  
839 with positions that crosslink to specific MlaA peptides indicated (*left*), and a structural model of  
840 MlaA (17) with peptides crosslinked by OmpC<sub>pBpa</sub> highlighted (*right*). The OM boundary is  
841 indicated as gray dashed lines.  
842

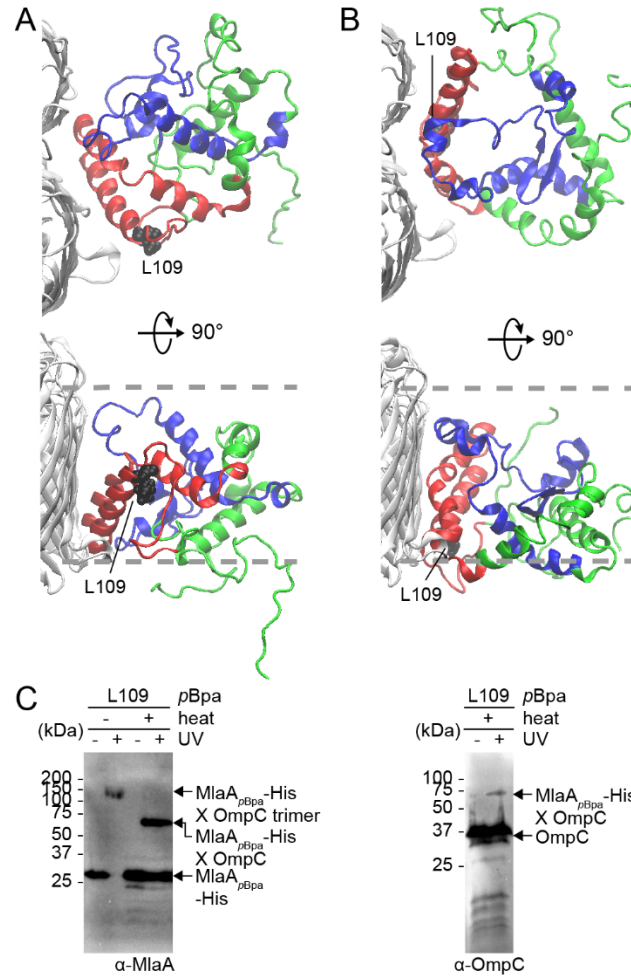

843

844 **Figure 3.** Molecular models of the OmpC-MlaA complex depict how MlaA may interact with  
845 OmpC in the OM bilayer. (A) and (B) Representative MlaA structures bound to OmpC in two  
846 possible orientations selected from all-atomistic MD simulation trajectories. MlaA<sub>D61-K124</sub> and  
847 MlaA<sub>F133-R205</sub> peptides are highlighted in *red* and *blue*, respectively, as in Fig. 2D. L109 is  
848 labelled and depicted as *black* spheres on MlaA. The OM boundaries are indicated as *gray*  
849 dashed lines. (C) Immunoblots showing UV-dependent formation of a crosslink between MlaA  
850 and OmpC in  $\Delta mlaA$  cells expressing MlaA<sub>L109</sub>*pBpa*-His. As expected, the crosslinked product  
851 also exhibits heat-modifiable gel shift, indicative of the presence of OmpC.

852

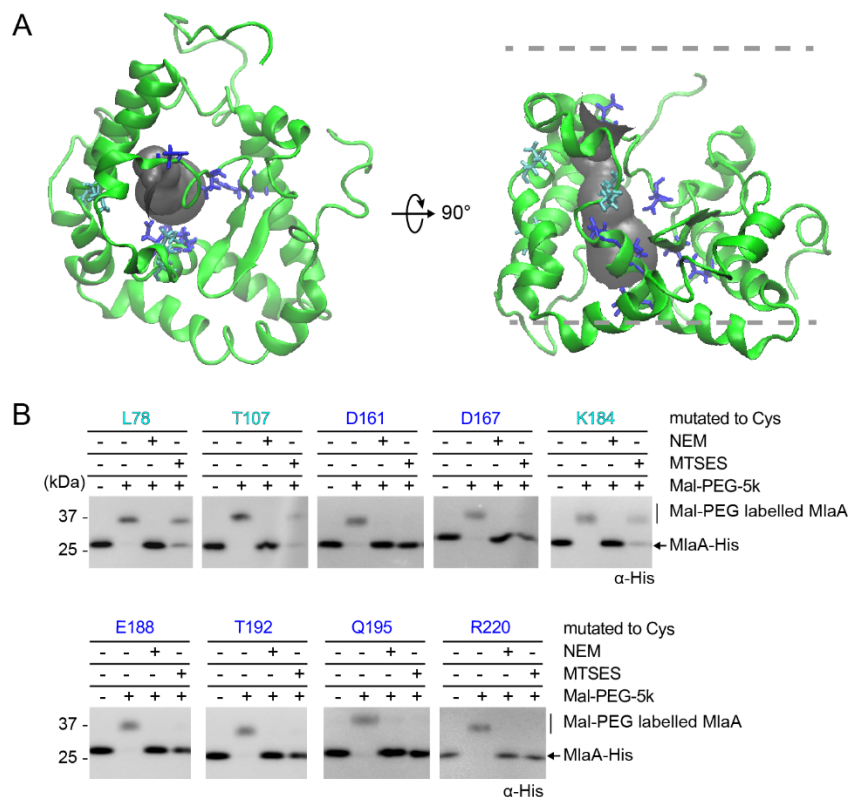

853

854 **Figure 4.** MlaA forms a hydrophilic channel in the OM. (A) A representative structure of MlaA  
855 from all-atomistic MD simulations with its putative channel depicted in *gray*. Residues in the  
856 channel that are fully or partially solvent accessible, based on SCAM in (B), are highlighted in  
857 *blue* and *cyan*, respectively. (B) Immunoblots showing maleimide-polyethylene glycol (Mal-  
858 PEG) alkylation of MlaA variants containing channel-facing residues substituted with cysteine  
859 (as depicted in (A)) following labelling by membrane permeable *N*-ethylmaleimide (NEM) or  
860 impermeable (MTSES) reagents. Mal-PEG alkylated MlaA<sub>Cys</sub>-His variants show a ~5 kDa mass  
861 shift. Positions fully or partially blocked by MTSES, which reflects the level of solvent  
862 accessibility, are highlighted in *blue* or *cyan*, respectively.

863

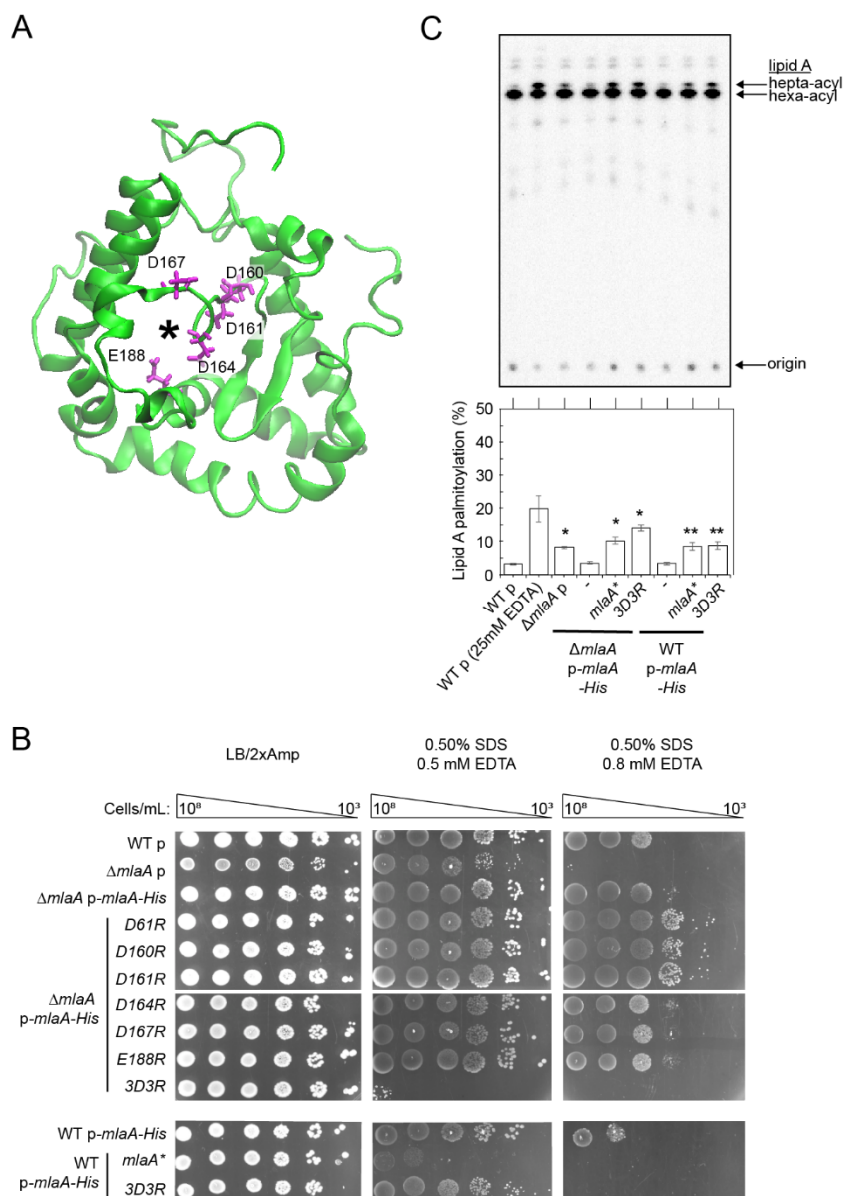

864

865 **Figure 5.** A triple charge-inversion mutation in the hydrophilic channel within MlaA results in  
 866 gain-of-function phenotypes. (A) A representative structure of MlaA from all-atomistic MD  
 867 simulations (as in Fig. 3, top view) with position of the channel depicted by an *asterisk*.  
 868 Negatively charged residues mutated to arginine are highlighted (*magenta*, in sticks). (B)  
 869 Analysis of SDS/EDTA sensitivity of wild-type (WT) and  $\Delta mlaA$  strains producing indicated  
 870 MlaA variants at low levels from the pET23/42 vector (p) (12). Serial dilutions of respective  
 871 cultures were spotted on LB agar plates containing Amp, supplemented with or without 0.50%

872 SDS and 0.5/0.8 mM EDTA, as indicated, and incubated overnight at 37 °C. (C) Representative  
873 thin layer chromatography (TLC)/autoradiographic analysis of [<sup>32</sup>P]-labeled lipid A extracted  
874 from exponential phase cultures of strains described in (B). As a positive control for lipid A  
875 palmitoylation, WT cells were treated with 25 mM EDTA for 10 min prior to extraction. Equal  
876 amounts of radioactive material were spotted for each sample. Average percentages of  
877 palmitoylation of lipid A and the standard deviations were quantified from triplicate experiments  
878 and plotted below. Student's t-tests: \*,  $p < 0.005$  compared to WT with empty vector; \*\*,  $p <$   
879  $0.001$  compared to WT *p-mlaA-His*.

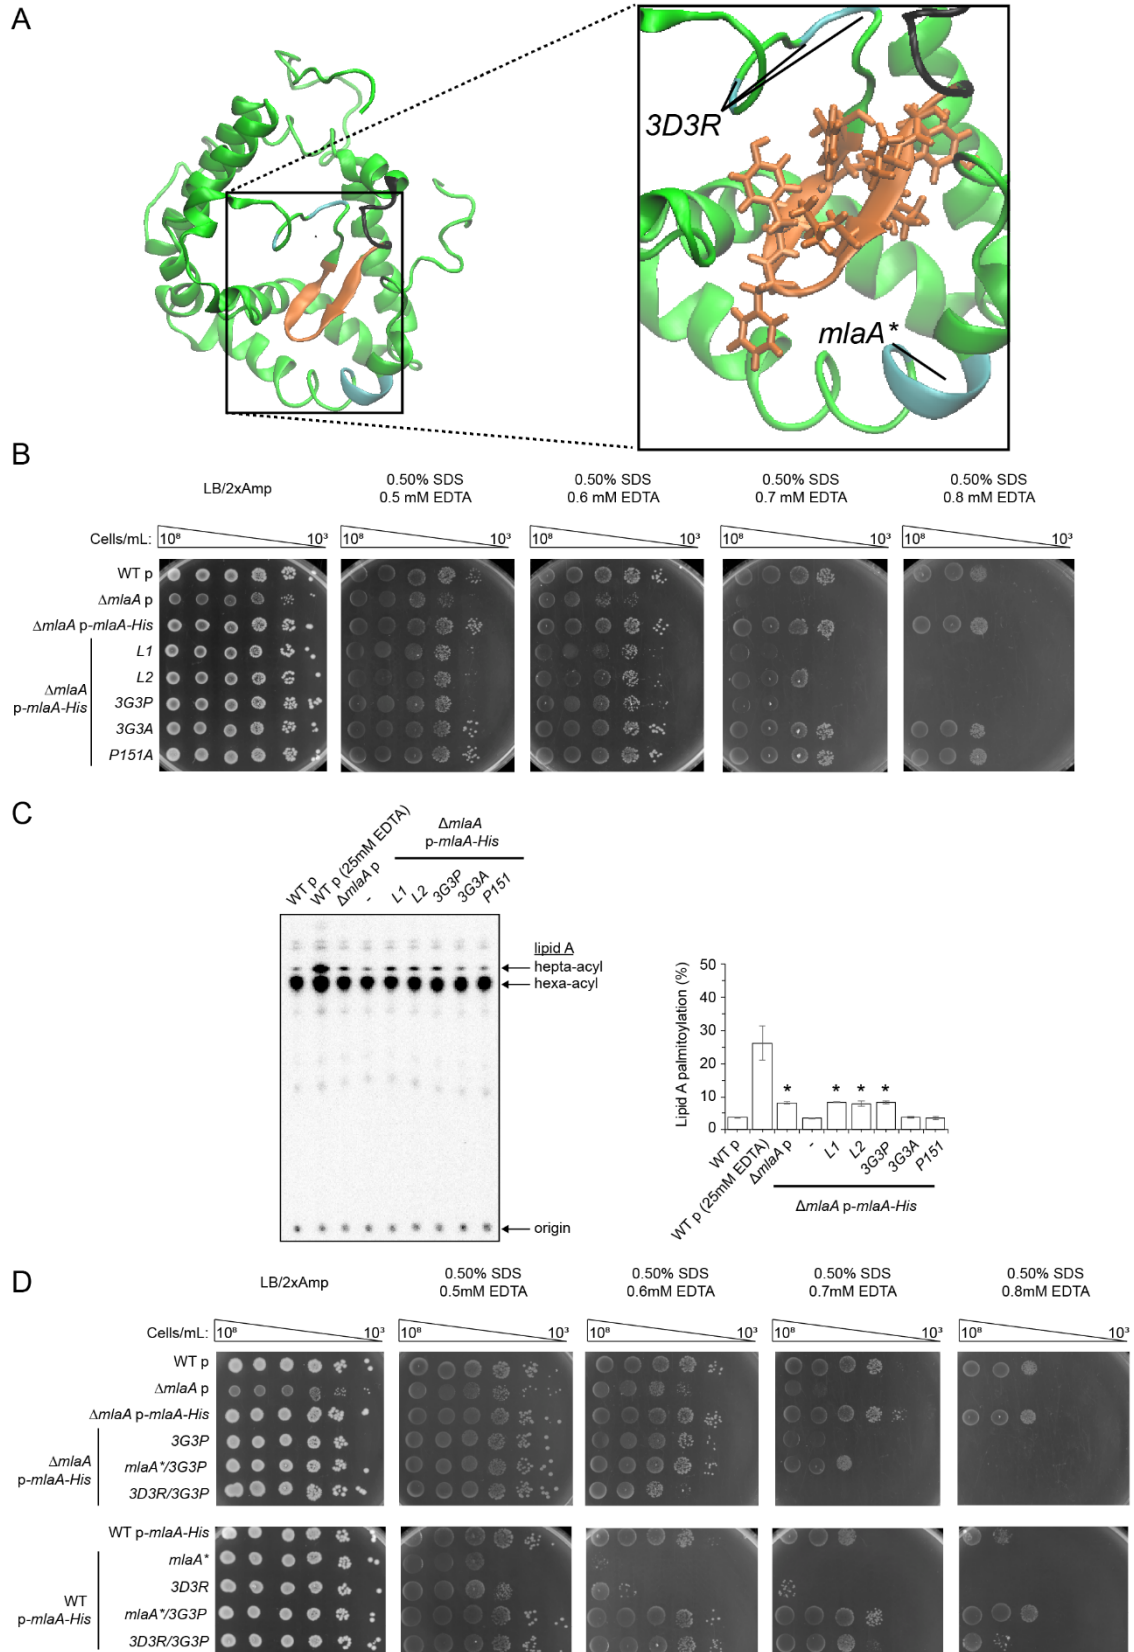

881 **Figure 6.** Flexibility in a hairpin loop structure on MlaA adjacent to the hydrophilic channel is  
882 critical for function. (A) A representative structure of MlaA from all-atomistic MD simulations  
883 (as in Fig. 3B) with the hairpin loop adjacent to the hydrophilic channel highlighted. In the  
884 expanded representation, the *3D3R* and *m1aA\** mutations, the hairpin loop, and the glycine rich  
885 region N-terminal to the loop are colored in *cyan*, *orange* and *black*, respectively. Residues on  
886 the hairpin loop chosen for mutation are represented in sticks. (B) Analysis of SDS/EDTA  
887 sensitivity of wild-type (WT) and  $\Delta m1aA$  strains producing indicated MlaA loop variants from  
888 the pET23/42 vector (p). (C) Representative TLC/autoradiographic analysis of [ $^{32}$ P]-labeled lipid  
889 A extracted from exponential phase cultures of strains described in (B). Equal amounts of  
890 radioactive material were spotted for each sample. Average percentages of palmitoylation of  
891 lipid A and the standard deviations were quantified from triplicate experiments and plotted on  
892 the right. Student's t-tests: \*,  $p < 0.0005$  compared to WT with empty vector. (D) Analysis of  
893 SDS/EDTA sensitivity of wild-type (WT) and  $\Delta m1aA$  strains producing indicated MlaA variants  
894 from the pET23/42 vector (p).

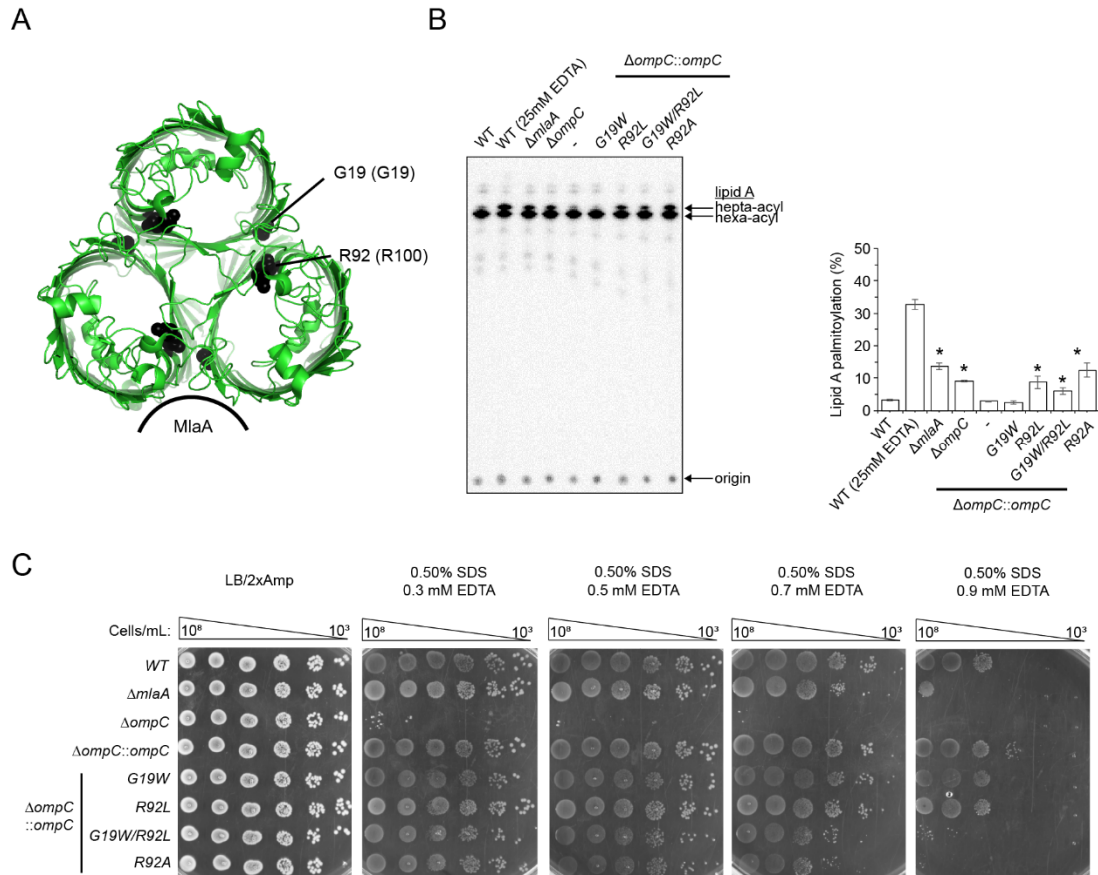

895

896 **Figure 7.** A specific mutation in the dimeric interface of the OmpC trimer results in perturbation  
 897 in OM lipid asymmetry. (A) Cartoon representation of the crystal structure of OmpC trimer  
 898 illustrating the positions of G19 and R92 region. (B) Analysis of SDS/EDTA sensitivity of wild-  
 899 type (WT) and  $\Delta ompC$  strains producing indicated OmpC variants from the chromosomal locus.  
 900 (C) Representative TLC/autoradiographic analysis of [ $^{32}$ P]-labeled lipid A extracted from  
 901 stationary phase cultures of strains described in (B). Equal amounts of radioactive material were  
 902 spotted for each sample. Average percentages of palmitoylation of lipid A and the standard  
 903 deviations were quantified from triplicate experiments and plotted on the right. Student's t-tests:  
 904 \*,  $p < 0.005$  compared to  $\Delta ompC::ompC$ .
